# Supplementary material for: Hierarchical micro- and mesoporous metal–organic framework-based magnetic nanospheres for the nontargeted analysis of chemical hazards in vegetables
Source: Royal Society of Chemistry journal article supplement (doi:10.1039/d1ta00120e), 2021-01-01
Supplement: d1ta00120e1.pdf [file d1ta00120e1.pdf]

## Supporting Information

### **Hierarchically Micro- and Mesoporous Metal-Organic Framework-Based Magnetic Nanospheres for Nontargeted Analysis of Chemical Hazards in Vegetables**

Yushen Jin,<sup>a,b</sup> Yan Qi,<sup>c</sup> Chu Tang,<sup>d</sup> Bing Shao<sup>a,b,c\*</sup>

<sup>a</sup> Beijing Key Laboratory of Diagnostic and Traceability Technologies for Food Poisoning,  
Beijing Centre for Disease Preventive Medical Research, Beijing 100013, China

<sup>b</sup> Central Research Laboratory, Beijing Centre for Disease Control and Prevention, Beijing 100013,  
China.

<sup>c</sup> College of Veterinary Medicine, China Agricultural University, Beijing 100193, China.

<sup>d</sup> Engineering Research Centre of Molecular and Neuro Imaging, Ministry of Education, School of  
Life Science and Technology, Xidian University, Xi'an, 710126, Shaanxi, China.

\*Corresponding author. Email: shaobingch@sina.com

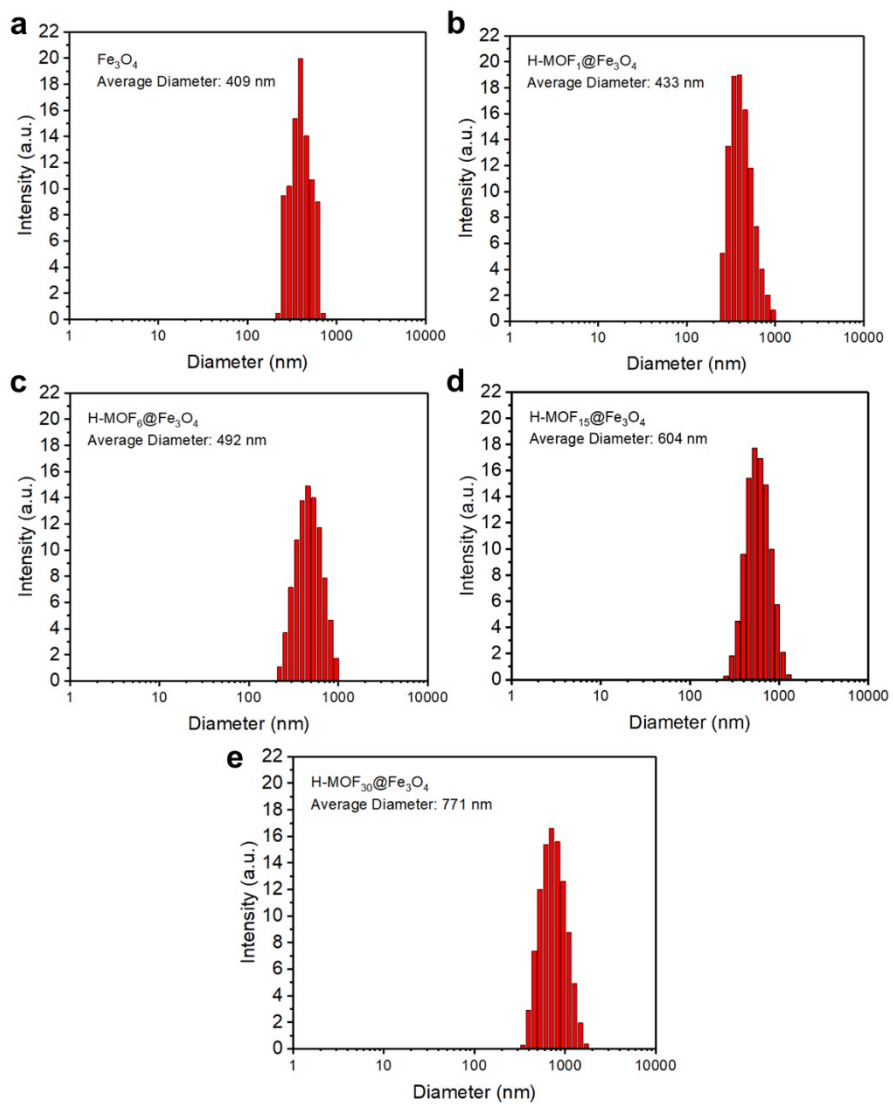

**Figure S1.** Size distribution of (a)  $\text{Fe}_3\text{O}_4$ , (b) H-MOF<sub>1</sub>@ $\text{Fe}_3\text{O}_4$ , (c) H-MOF<sub>6</sub>@ $\text{Fe}_3\text{O}_4$ , (d) H-MOF<sub>15</sub>@ $\text{Fe}_3\text{O}_4$  and (e) H-MOF<sub>30</sub>@ $\text{Fe}_3\text{O}_4$  tested by DLS

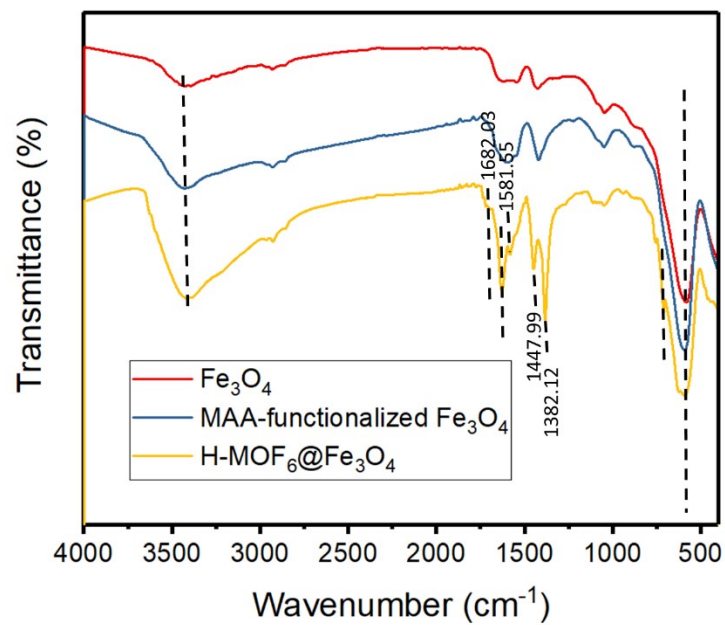

**Figure S2.** FT-IR spectra of  $\text{Fe}_3\text{O}_4$ , MAA-functionalized  $\text{Fe}_3\text{O}_4$  and  $\text{H-MOF}_6@\text{Fe}_3\text{O}_4$  nanospheres.

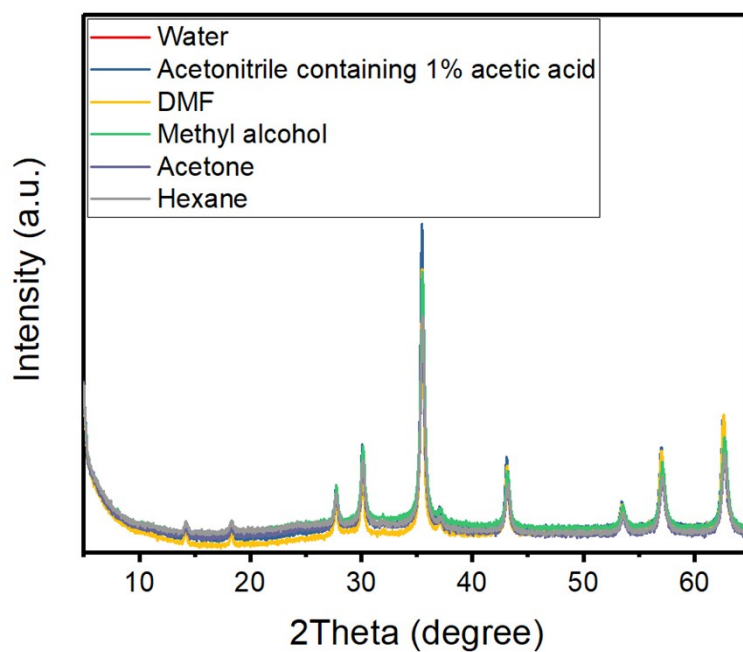

**Figure S3.** PXRD pattern of  $\text{H-MOF}_6@\text{Fe}_3\text{O}_4$  nanospheres after incubated with various solvents.

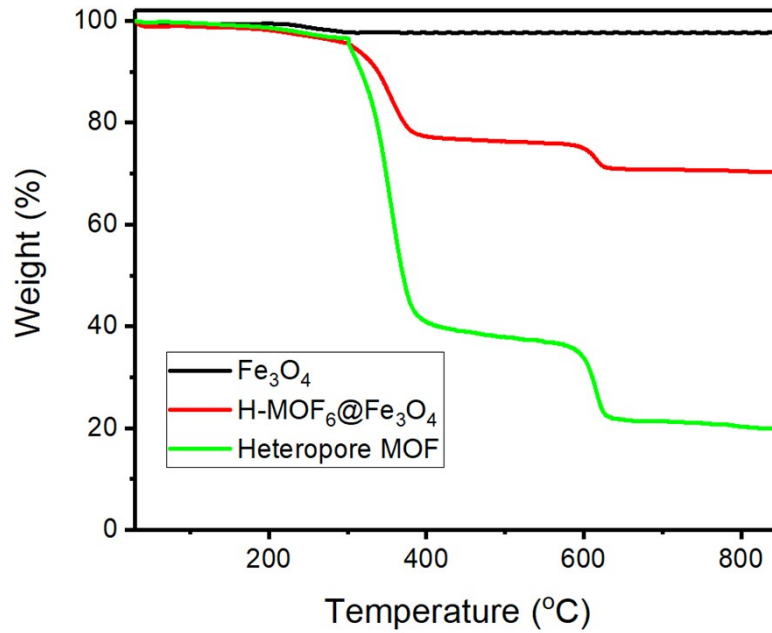

**Figure S4.** TG analysis of Fe<sub>3</sub>O<sub>4</sub>, MAA-functionalized Fe<sub>3</sub>O<sub>4</sub> and H-MOF<sub>6</sub>@Fe<sub>3</sub>O<sub>4</sub> nanospheres.

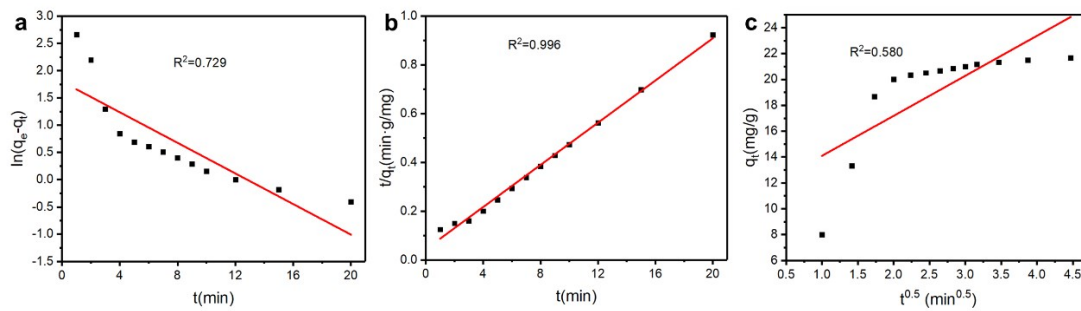

**Figure S5.** Chlorophylls adsorption kinetics characterization of MCOFs by (a) pseudo-first-order, (b) pseudo-second-order kinetic models and (c) intra-particle diffusion model

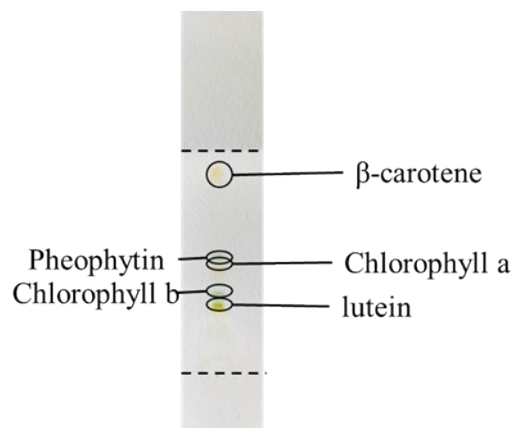

**Figure. S6** Separation of spinach extracts by thin layer chromatography

**Table S1** Conditions of gradient elution(No.1-No.46)

| Time (min) | Mobile phase (%) |          | Flow rate<br>(mL/min) | injected<br>sample<br>volume ( $\mu$ L) |
|------------|------------------|----------|-----------------------|-----------------------------------------|
|            | Water+0.1% FA    | Methanol |                       |                                         |
| 0          | 90               | 10       | 0.3                   | 2                                       |
| 0.3        | 90               | 10       | 0.3                   | 2                                       |
| 4.5        | 45               | 55       | 0.3                   | 2                                       |
| 12         | 45               | 55       | 0.3                   | 2                                       |
| 13         | 30               | 70       | 0.3                   | 2                                       |
| 15         | 30               | 70       | 0.3                   | 2                                       |
| 17         | 0                | 100      | 0.3                   | 2                                       |
| 23         | 0                | 100      | 0.3                   | 2                                       |
| 23.1       | 90               | 10       | 0.3                   | 2                                       |
| 25         | 90               | 10       | 0.3                   | 2                                       |

**Table S2** Conditions of gradient elution (No.47-No.258)

| Time (min) | Mobile phase (%) |          | Flow rate<br>(mL/min) | injected<br>sample<br>volume ( $\mu$ L) |
|------------|------------------|----------|-----------------------|-----------------------------------------|
|            | Water+0.1% FA    | Methanol |                       |                                         |
| 0          | 98               | 2        | 0.3                   | 5                                       |
| 0.25       | 98               | 2        | 0.3                   | 5                                       |
| 20         | 1                | 99       | 0.3                   | 5                                       |
| 25         | 1                | 99       | 0.3                   | 5                                       |
| 25.1       | 98               | 2        | 0.3                   | 5                                       |
| 30         | 98               | 2        | 0.3                   | 5                                       |

**Table S3** MRM transitions and other LC-MS/MS parameters

| Analytes                                     | Serial number | Retention time (min) | Precursor ion                        | Confirmation ion <sup>(a)</sup> | Quantification ion <sup>(a)</sup> | Fragmentor <sup>(a)</sup> |
|----------------------------------------------|---------------|----------------------|--------------------------------------|---------------------------------|-----------------------------------|---------------------------|
| 3-Hydroxycarbofuran                          | 1             | 6.11                 | 239.1                                | 163.1(22.5)                     | 181.1(38)                         | 50                        |
| 4-Bromo-3,5-dimethylphenyl-N-methylcarbamate | 2             | 11.9                 | 258                                  | 201(15)                         | 122.1(31)                         | 25                        |
| Fenpropidin                                  | 3             | 10.7                 | 274.2                                | 147.2(39)                       | 86.2(35)                          | 50                        |
| Fenoxycarb                                   | 4             | 13.34                | 302.1                                | 88(27)                          | 116.1(15)                         | 40                        |
| Dichlofenthion                               | 5             | 17.42                | 315                                  | 259(24)                         | 268.9(15)                         | 38                        |
| Trichlorfon                                  | 6             | 5.64                 | 256.9                                | 109(24)                         | 221(14)                           | 35                        |
| Propachlor                                   | 7             | 10.81                | 212.1                                | 170.1(31)                       | 94.1(31)                          | 40                        |
| Dioxathion                                   | 8             | 16.84                | 479                                  | 271.1(20)                       | 293.2(19)                         | 35                        |
| Tebuthiuron                                  | 9             | 7.60                 | 229.1                                | 172.1(18)                       | 116.1(34)                         | 40                        |
| Lontrel                                      | 10            | 3.43                 | 191.9                                | 174(16)                         | 146(30)                           | 43                        |
| Dinotefuran                                  | 11            | 12.93                | 203.1                                | 105.1(34)                       | 91.1(48)                          | 40                        |
| Furanthiocarb                                | 12            | 16.45                | 383.2                                | 195(27.5)                       | 252.1(18)                         | 33                        |
| Bioallethrin                                 | 13            | 16.66                | 303.2                                | 121.1(27)                       | 149.1(25)                         | 35                        |
| Asulam                                       | 14            | 4.80                 | 231                                  | 156(15)                         | 108.1(27)                         | 50                        |
| Griseofulvin                                 | 15            | 10.40                | 353.1                                | 165.1(37)                       | 285.1(34)                         | 40                        |
| Sulfosulfuron                                | 16            | 10.69                | 471.1                                | 211.1(30)                       | 261.1(27)                         | 50                        |
| Benoxacor                                    | 17            | 12.21                | 260                                  | 149.1(26)                       | 134.1(41)                         | 58                        |
| Bromuconazol                                 | 18            | 12.50                | 376                                  | 159(40)                         | 70.1(54)                          | 60                        |
| Butafenacil                                  | 19            | 13.92                | 475.1                                | 345(35)                         | 331(38)                           | 25                        |
| Thiodicarb                                   | 20            | 9.20                 | 355.1                                | 88(20)                          | 108.1(23)                         | 40                        |
| Mesurolo                                     | 21            | 11.74                | 226.1                                | 169.1(17)                       | 121(25)                           | 65                        |
| Flazasulfuron                                | 22            | 11.17                | 408.1                                | 182.1(30)                       | 301.1(20)                         | 40                        |
| Methomyl                                     | 23            | 4.75                 | 163.1                                | 88.1(18)                        | 106.1(18)                         | 33                        |
| Aminocarb                                    | 24            | 3.44                 | 209.1                                | 152.1(18)                       | 137.1(32)                         | 31                        |
| Ethofenprox                                  | 25            | 19.38                | 394.3(NH <sub>4</sub> <sup>+</sup> ) | 177.2(19)                       | 359.3(17)                         | 35                        |
| Promecarb                                    | 26            | 12.07                | 208.2                                | 109.1(21)                       | 151.1(12)                         | 35                        |
| Benodanil                                    | 27            | 11.51                | 324                                  | 230.9(28)                       | 105.2(28)                         | 32                        |
| Mecarbam                                     | 28            | 13.95                | 330                                  | 199(21)                         | 142.9(35)                         | 31                        |
| Diphenamid                                   | 29            | 11.04                | 240.1                                | 134.1(24.5)                     | 167.1(31.5)                       | 60                        |
| Triflumuron                                  | 30            | 14.32                | 359.1                                | 156(23)                         | 139(45)                           | 40                        |
| Tricyclazole                                 | 31            | 6.99                 | 190.1                                | 163(28)                         | 136(37)                           | 65                        |
| Propamocarb                                  | 32            | 3.60                 | 189.2                                | 102.1(24)                       | 144.1(18)                         | 43                        |
| Cymoxanil                                    | 33            | 7.34                 | 199.1                                | 128.1(13)                       | 111.1(26)                         | 40                        |
| Etoxazole                                    | 34            | 17.46                | 360.2                                | 141.1(45.2)                     | 304.1(24)                         | 70                        |
| Altrenogest                                  | 35            | 12.10                | 311.1                                | 221.1(23)                       | 269.3(23)                         | 56                        |
| Tolfenamic acid                              | 36            | 14.36                | 262.1                                | 244.1(22)                       | 209.1(39)                         | 40                        |

|                             |    |       |       |           |             |    |
|-----------------------------|----|-------|-------|-----------|-------------|----|
| Aldicarb-sulfone            | 37 | 4.45  | 223.1 | 148.1(13) | 86.1(19)    | 41 |
| Aldicarb sulfoxide          | 38 | 3.57  | 207   | 132(12)   | 89.1(32)    | 34 |
| DEF 6                       | 39 | 18.57 | 315.1 | 169(20)   | 259.1(18)   | 42 |
| Carboxin                    | 40 | 10.14 | 236.1 | 143.1(22) | 87(36)      | 60 |
| Methoprene                  | 41 | 12.07 | 311.1 | 221.1(23) | 261.1(26)   | 47 |
| EPTC                        | 42 | 13.80 | 190.1 | 128.1(17) | 86.1(15)    | 40 |
| Ethiofencarb                | 43 | 10.13 | 226.1 | 107.1(20) | 164.1(11)   | 40 |
| Ethion                      | 44 | 17.21 | 385   | 199(14.3) | 215.1(15.7) | 25 |
| Diethofencarb               | 45 | 17.47 | 268   | 226.2(15) | 180.1(24)   | 35 |
| Triallate                   | 46 | 11.81 | 304   | 86.1(22)  | 143(36)     | 45 |
| Mandestrobin                | 47 | 14.61 | 314   | 192(18)   | 132(35)     | 30 |
| Valifenalate                | 48 | 11.68 | 399.1 | 155(30)   | 197(20)     | 30 |
| Chlormequat                 | 49 | 0.77  | 122   | 63(17)    | 59(17)      | 30 |
| Fenpyrazamine               | 50 | 10.99 | 332.1 | 272(14)   | 304(14)     | 30 |
| Fenthion                    | 51 | 14.44 | 279.1 | 169.1(16) | 247.1(13)   | 36 |
| Aclonifen                   | 52 | 14.1  | 265   | 248(18)   | 182(32)     | 30 |
| Difenoconazole              | 53 | 16.3  | 406   | 251.1(25) | 111.1(60)   | 46 |
| Phenothrin                  | 54 | 17.91 | 351   | 156(28)   | 237(12)     | 30 |
| Saflufenacil                | 55 | 7.98  | 501   | 349(25)   | 459(12)     | 30 |
| Zoxamide                    | 56 | 14.72 | 336   | 159(38)   | 187.1(25)   | 38 |
| Fenamiphos                  | 57 | 13.98 | 304.1 | 217.1(24) | 202.1(36)   | 36 |
| Pyraflufen Ethyl            | 58 | 14.85 | 413   | 338.8(20) | 289(27)     | 30 |
| pyriproxyfen                | 59 | 17.11 | 322.1 | 96(14)    | 227.1(14)   | 32 |
| Haloxyfop                   | 60 | 16.57 | 362   | 91(30)    | 288(30)     | 30 |
| Isopyrazam                  | 61 | 16.28 | 360.2 | 320(20)   | 258(20)     | 30 |
| Resmethrin                  | 62 | 17.77 | 339.2 | 171(17)   | 143(25)     | 30 |
| Propoxycarbazone-<br>sodium | 63 | 5.8   | 399   | 199(12)   | 367(12)     | 30 |
| Propiconazole               | 64 | 14.95 | 342   | 159(34)   | 69(22)      | 46 |
| Prothioconazole             | 65 | 14.96 | 344   | 189(20)   | 326(12)     | 22 |
| Oxadiazyl                   | 66 | 15.28 | 341   | 151(25)   | 258(15)     | 30 |
| Flumioxazin                 | 67 | 7.71  | 355.1 | 298(28)   | 326(22)     | 46 |
| Iprovalicarb                | 68 | 17.71 | 321.2 | 203.1(10) | 119.1(16)   | 30 |
| Methacrifos                 | 69 | 7.54  | 241   | 125(20)   | 209.1(8)    | 20 |
| Isoprothiolane              | 70 | 10    | 291.1 | 230.9(12) | 189(22)     | 30 |
| Tepraloxydim                | 71 | 6.01  | 342.1 | 250.1(12) | 166.1(20)   | 30 |
| Diuron                      | 72 | 7.13  | 233   | 71.5(15)  | 45.5(15)    | 30 |
| Anilazine                   | 73 | 9.95  | 274.9 | 153(26)   | 178(24)     | 46 |
| Iodosulfuron-methyl         | 74 | 9.45  | 508.1 | 167.1(25) | 141.1(25)   | 30 |
| Daminozide                  | 75 | 1.06  | 161   | 143(12)   | 61(12)      | 30 |
| Acetamiprid                 | 76 | 4.24  | 223   | 126(20)   | 56.1(15)    | 30 |
| Picoxystrobin               | 77 | 14.17 | 368.1 | 205.1(10) | 145.1(22)   | 20 |
| Carbendazim                 | 78 | 2.7   | 192.1 | 160.1(18) | 132.1(28)   | 30 |
| Sandofan                    | 79 | 5.04  | 279.1 | 219(10)   | 132(34)     | 40 |

|                        |     |       |       |           |           |    |
|------------------------|-----|-------|-------|-----------|-----------|----|
| Diphenylamine          | 80  | 10.82 | 170.1 | 93(24)    | 92(18)    | 38 |
| Diazinon               | 81  | 14.57 | 305.1 | 169(22)   | 97(35)    | 30 |
| Flutriafol             | 82  | 6.72  | 302.1 | 122.7(22) | 94.7(42)  | 30 |
| Rimsulfuron            | 83  | 6.23  | 432   | 182.1(22) | 325.1(14) | 30 |
| Phosalone              | 84  | 15.31 | 368   | 181.9(14) | 110.9(42) | 22 |
| Fluvalinate            | 85  | 17.79 | 503.1 | 181.1(30) | 208.1(12) | 24 |
| Fluopyram              | 86  | 12.3  | 397   | 173(27)   | 208(20)   | 30 |
| Fluazinam              | 87  | 17.14 | 464.9 | 373(26)   | 338.1(47) | 30 |
| Sulfoxaflor            | 88  | 4.47  | 278   | 174(10)   | 154(27)   | 30 |
| Flonicamid             | 89  | 3.08  | 230   | 203.1(12) | 174.1(17) | 30 |
| Flusilazole            | 90  | 14.09 | 316.1 | 247(18)   | 165(28)   | 36 |
| Epoxiconazole          | 91  | 13.32 | 330   | 121(22)   | 101(50)   | 34 |
| Tetraconazole          | 92  | 13.65 | 372   | 70(20)    | 159(30)   | 30 |
| Flucythrinate          | 93  | 17.32 | 469   | 412(10)   | 198.7(22) | 30 |
| Flufenacet             | 94  | 12.92 | 364   | 194.1(11) | 152.1(20) | 30 |
| Flutolanil             | 95  | 10.37 | 324.1 | 262.1(18) | 65(40)    | 30 |
| Procymidone            | 96  | 12.08 | 284   | 256.1(17) | 67.1(28)  | 30 |
| Thiobencarb            | 97  | 15.38 | 258   | 125(12)   | 100(12)   | 30 |
| Molinate               | 98  | 10.13 | 188.1 | 126(13)   | 55(24)    | 30 |
| Cyproconazole          | 99  | 11.81 | 292.1 | 69.5(18)  | 124.6(24) | 30 |
| Chromafenozide         | 100 | 12.37 | 395.2 | 175(22)   | 339(10)   | 30 |
| Cyflufenamide          | 101 | 15.5  | 413.1 | 295.1(15) | 203.1(35) | 30 |
| Sulcotrione            | 102 | 5.37  | 329   | 138.8(18) | 110.7(27) | 30 |
| Metosulam              | 103 | 5.89  | 418   | 175(28)   | 140(52)   | 30 |
| Tolylfluanide          | 104 | 14.47 | 347   | 137(28)   | 238(10)   | 30 |
| Alachlor               | 105 | 12.43 | 270.1 | 238.1(11) | 162.1(20) | 30 |
| Metsulfuron methyl     | 106 | 5.78  | 382   | 167(16)   | 199(22)   | 30 |
| Mesosulfuron-methyl    | 107 | 6.86  | 504   | 182(24)   | 83(60)    | 30 |
| Tolclofos-methyl       | 108 | 15.35 | 301   | 125(17)   | 175(29)   | 30 |
| Thiophanate-methyl     | 109 | 5.61  | 343   | 93(46)    | 151(22)   | 30 |
| Carbaryl               | 110 | 6.03  | 202   | 145(22)   | 117(28)   | 30 |
| Metalaxyl              | 111 | 7.05  | 280.1 | 220.1(13) | 192.1(17) | 30 |
| Metazachlor            | 112 | 6.82  | 278   | 134.1(22) | 210(10)   | 30 |
| Tebufenozide           | 113 | 14.12 | 353.1 | 133(20)   | 297.1(8)  | 30 |
| Famoxadone             | 114 | 15.3  | 397   | 260.9(14) | 167.7(16) | 30 |
| Emamectin              | 115 | 16.42 | 886.5 | 158.2(35) | 302.2(30) | 30 |
| cis and trans-Diallate | 116 | 16.21 | 270.1 | 86.1(15)  | 128.1(11) | 30 |
| Chloridazon            | 117 | 4.21  | 222   | 92(30)    | 77(30)    | 30 |
| Pendimethaline         | 118 | 17.24 | 282.1 | 212.1(10) | 194.1(17) | 30 |
| Trinexapac-ethyl       | 119 | 7.11  | 253.1 | 185.1(12) | 207.1(12) | 30 |
| Spirotetramat          | 120 | 12.78 | 374.2 | 330.2(15) | 302.2(15) | 30 |
| Cadusafos              | 121 | 15.86 | 271.1 | 159(16)   | 131(22)   | 30 |



|                   |     |       |       |           |           |    |
|-------------------|-----|-------|-------|-----------|-----------|----|
| Quinalphos        | 122 | 13.98 | 299   | 163(24)   | 97(30)    | 30 |
| Orthosulfamuron   | 123 | 6.96  | 425.1 | 199.1(12) | 227.1(15) | 30 |
| Cyhalofop-butyl   | 124 | 16.57 | 358.1 | 256.1(12) | 120.1(25) | 30 |
| Cyazofamid        | 125 | 13.66 | 325   | 108(20)   | 261(10)   | 30 |
| Lactofen          | 126 | 17.09 | 479   | 344(15)   | 223(32)   | 30 |
| Florasulam        | 127 | 4.98  | 360   | 129(22)   | 109(50)   | 30 |
| Mandipropamid     | 128 | 10.18 | 412.1 | 328.1(15) | 356.1(10) | 30 |
| Mesotrione        | 129 | 5.74  | 340   | 228(18)   | 104(32)   | 30 |
| Oxydemeton-methyl | 130 | 2.94  | 247   | 168.9(14) | 108.9(25) | 30 |
| Oxycarboxin       | 131 | 4.5   | 268.1 | 174.8(16) | 146.9(25) | 30 |
| Spinetoram L      | 132 | 15.79 | 760.5 | 142.1(30) | 98.1(30)  | 30 |
| Ethirimol         | 133 | 4.32  | 210.1 | 140(22)   | 98(28)    | 30 |
| Ethoxyquin        | 134 | 5.6   | 218.1 | 148.1(22) | 160.1(32) | 30 |
| Propisochlor      | 135 | 14.26 | 284.1 | 224.1(10) | 148.1(17) | 30 |
| Isoproturon       | 136 | 6.89  | 207   | 71.4(17)  | 45.3(15)  | 30 |
| Butralin          | 137 | 17.42 | 296.2 | 239.9(12) | 221.8(20) | 30 |
| Azocyclotin       | 138 | 14.33 | 437.2 | 287.1(17) | 205.1(22) | 30 |
| Amidosulfuron     | 139 | 6.46  | 370   | 261(15)   | 218(25)   | 30 |
| Fentin            | 140 | 5.64  | 351.1 | 119.9(30) | 197(25)   | 30 |
| Ametoctradin      | 141 | 15.3  | 276.2 | 149.1(35) | 177.1(35) | 30 |
| Atrazine          | 142 | 6.6   | 216.1 | 174.1(18) | 96.1(23)  | 30 |
| Vinclozolin       | 143 | 13.11 | 286   | 174(35)   | 218(17)   | 30 |
| Barban            | 144 | 10.95 | 258   | 178(10)   | 143.1(20) | 30 |
| Tridemorph        | 145 | 13.68 | 298.3 | 98(34)    | 57(28)    | 30 |
| Bromophos-ethyl   | 146 | 17.79 | 395   | 339(17)   | 367(10)   | 30 |
| Chloroxuron       | 147 | 11.8  | 291.1 | 72(25)    | 164.1(15) | 30 |
| Bromopropylate    | 148 | 17.21 | 411   | 209(30)   | 325(12)   | 30 |
| Nicosulfuron      | 149 | 5.47  | 411.1 | 182(32)   | 106(22)   | 30 |
| Fenpyroximate     | 150 | 17.48 | 422.2 | 366.1(15) | 138.1(32) | 30 |
| Acequinocyl       | 151 | 18.17 | 357.2 | 329(20)   | 203(20)   | 30 |
| Bifenazate        | 152 | 12.03 | 301.1 | 198(10)   | 170(20)   | 30 |
| Trifloxystrobin   | 153 | 16.56 | 409.1 | 186(16)   | 145(40)   | 30 |
| Cyantraniliprole  | 154 | 6.09  | 475   | 286(12)   | 177(45)   | 30 |
| Phosmet           | 155 | 11.42 | 289.1 | 70.1(18)  | 125.1(32) | 30 |
| Bitertanol        | 156 | 15.6  | 338.1 | 99.1(16)  | 70.1(8)   | 30 |
| Triadimenol       | 157 | 11.72 | 296.1 | 70.1(10)  | 99.1(15)  | 30 |
| Maleic hydrazide  | 158 | 1.08  | 113   | 67(17)    | 85(15)    | 30 |
| Metolachlor       | 159 | 13.01 | 284.1 | 252.1(15) | 176.1(25) | 30 |
| Triclopyr         | 160 | 9.45  | 256   | 180(27)   | 210(15)   | 30 |
| Fenamidone        | 161 | 9.17  | 312.1 | 92(25)    | 236.1(14) | 30 |
| Novaluron         | 162 | 16.88 | 493   | 158(19)   | 141(35)   | 30 |
| Monolinuron       | 163 | 6.07  | 215   | 126(22)   | 99(34)    | 30 |
| Carbofuran        | 164 | 5.61  | 222.1 | 123(16)   | 165.1(16) | 30 |
| Tefluthrin        | 165 | 7.9   | 436   | 177(17)   | 325(7)    | 30 |

|                              |     |       |       |           |           |    |
|------------------------------|-----|-------|-------|-----------|-----------|----|
| Buprofezin                   | 166 | 15.51 | 306.1 | 201(12)   | 57.4(20)  | 30 |
| Dimethomorph                 | 167 | 9.17  | 388.1 | 301(20)   | 165(30)   | 30 |
| Warfarin                     | 168 | 9.73  | 309.1 | 163(12)   | 251(25)   | 30 |
| Metribuzin                   | 169 | 5.52  | 215   | 131(18)   | 89(20)    | 30 |
| Pirimicarb                   | 170 | 4.18  | 239.1 | 72(18)    | 182.1(15) | 30 |
| Fenbuconazole                | 171 | 14.01 | 337   | 125(36)   | 70.1(20)  | 30 |
| Chlorotoluron                | 172 | 6.43  | 213   | 46(16)    | 72(18)    | 30 |
| Acetochlor                   | 173 | 12.13 | 270.1 | 223.8(12) | 147.8(17) | 30 |
| Methoxyfenozide              | 174 | 10.64 | 369.1 | 313.1(8)  | 149.1(18) | 30 |
| Amitraz                      | 175 | 17.8  | 294.2 | 122(35)   | 163(19)   | 30 |
| Acephate                     | 176 | 1.92  | 205.7 | 63.6(9)   | 164.6(9)  | 30 |
| Flupyradifurone              | 177 | 4.26  | 291   | 127.9(15) | 89.9(37)  | 30 |
| Pyrasulfotole                | 178 | 5.64  | 363   | 251(20)   | 113(16)   | 30 |
| Abamectin                    | 179 | 17.82 | 895.5 | 751(40)   | 449(42)   | 30 |
| Oryzalin                     | 180 | 13.9  | 347   | 288(16)   | 305(16)   | 30 |
| Benzovindiflupyr             | 181 | 15.06 | 398   | 342(16)   | 378(12)   | 30 |
| Metrafenone                  | 182 | 15.73 | 409   | 209(20)   | 277(20)   | 30 |
| Benthiavalicarb<br>isopropyl | 183 | 10.57 | 382.1 | 180(30)   | 115.6(22) | 30 |
| Benzalkonium<br>chloride     | 184 | 16.11 | 332.7 | 91(30)    | 240(18)   | 30 |
| Imidacloprid                 | 185 | 3.86  | 256   | 209(16)   | 175(20)   | 30 |
| Tebufenpyrad                 | 186 | 17.02 | 334.2 | 145(26)   | 116.8(30) | 30 |
| Penthiopyrad                 | 187 | 14.88 | 360.1 | 276(12)   | 177(28)   | 30 |
| Prosulfocarb                 | 188 | 16.59 | 252.1 | 91(18)    | 128(10)   | 30 |
| Profenofos                   | 189 | 16.87 | 374.9 | 304.6(18) | 346.9(12) | 30 |
| Cycloxydim                   | 190 | 16.39 | 326.2 | 280(10)   | 180(20)   | 30 |
| Pyridaben                    | 191 | 17.74 | 365.1 | 309(10)   | 147(22)   | 30 |
| Propanil                     | 192 | 9.07  | 218   | 161.5(12) | 126.5(22) | 30 |
| Butylate                     | 193 | 16.64 | 218.1 | 56.5(12)  | 156(8)    | 30 |
| Chlorfenvinphos              | 194 | 15.03 | 359   | 98.6(24)  | 170(40)   | 30 |
| Chlorpyrifos                 | 195 | 17.26 | 350   | 96.6(20)  | 198(20)   | 30 |
| Dimethenamid                 | 196 | 9.04  | 276   | 244(16)   | 167.8(18) | 30 |
| Flurtamone                   | 197 | 9.17  | 334   | 247(28)   | 227(30)   | 30 |
| Formetanate<br>Hydrochloride | 198 | 1.77  | 222   | 165(14)   | 120(26)   | 30 |
| Flubendiamide                | 199 | 14.75 | 705   | 173.8(32) | 530.8(38) | 30 |
| Beflubutamid                 | 200 | 14.66 | 356.1 | 91(28)    | 162(26)   | 30 |
| Fipronil                     | 201 | 14.41 | 459   | 390(15)   |           |    |
| Fluoxastrobin                | 202 | 13.37 | 459   | 427(16)   | 188(40)   | 30 |
| Fluxapyroxad                 | 203 | 10.98 | 382.1 | 342(18)   | 362(14)   | 30 |
| Silthiofam                   | 204 | 14.24 | 269.1 | 139(22)   | 72.5(20)  | 30 |
| Tembotrione                  | 205 | 9.32  | 441   | 341(6)    | 305(18)   | 30 |
| Oxasulfuron                  | 206 | 5.37  | 407   | 150(34)   | 106.7(40) | 30 |

|                      |     |       |       |           |           |    |
|----------------------|-----|-------|-------|-----------|-----------|----|
| Parathion-methyl     | 207 | 8.67  | 264   | 125(20)   | 109(18)   | 30 |
| Pirimiphos-methyl    | 208 | 14.13 | 306.1 | 164(16)   | 108(34)   | 30 |
| Methiocarb           | 209 | 9.28  | 226   | 169(10)   | 121(14)   | 30 |
| Bifenox              | 210 | 16.04 | 342   | 310(10)   |           |    |
| Foramsulfuron        | 211 | 6.08  | 453   | 182(20)   | 272(10)   | 30 |
| Azoxystrobin         | 212 | 8.88  | 404   | 372(18)   | 344(24)   | 30 |
| Bupirimate           | 213 | 8.74  | 317.1 | 166(30)   | 272(18)   | 30 |
| Triadimefon          | 214 | 10.85 | 294.1 | 225(12)   | 179(16)   | 30 |
| Clothianidin         | 215 | 3.93  | 250   | 169(10)   | 131.6(20) | 30 |
| Clomazone            | 216 | 7.96  | 240.1 | 125(16)   | 89(40)    | 30 |
| Dodemorph            | 217 | 5.94  | 282.3 | 116(20)   | 98(26)    | 30 |
| Desmedipham          | 218 | 7.85  | 301.1 | 136(18)   | 108(20)   | 30 |
| Diniconazole         | 219 | 16.09 | 326   | 69.6(24)  | 225(26)   | 30 |
| Imazalil             | 220 | 5.63  | 297   | 159(20)   | 255(16)   | 30 |
| Isoxaflutole         | 221 | 7.1   | 360   | 251(10)   | 220(32)   | 30 |
| Indoxacarb           | 222 | 16.63 | 528.1 | 150(20)   | 293(12)   | 30 |
| Methidathion         | 223 | 7.53  | 303   | 145(8)    | 84.7(14)  | 30 |
| Monuron              | 224 | 5.48  | 199   | 71.6(14)  | 125.7(22) | 30 |
| Penconazole          | 225 | 14.64 | 284   | 69.9(16)  | 158.8(26) | 30 |
| Phenmedipham         | 226 | 8.03  | 301.1 | 168(8)    | 135.8(18) | 30 |
| Propargite           | 227 | 17.45 | 373.1 | 80.6(24)  | 142.6(16) | 30 |
| Malathion            | 228 | 10.36 | 331   | 285(6)    | 127(10)   | 30 |
| Triticonazole        | 229 | 13.17 | 318.1 | 69.7(16)  | 124.5(36) | 30 |
| Thiamethoxam         | 230 | 3.25  | 292   | 211(8)    | 181(18)   | 30 |
| Thiodicarb           | 231 | 6.16  | 377   | 63.7(14)  | 112.8(14) | 30 |
| Tralkoxydim          | 232 | 17.29 | 330.2 | 284(8)    | 138(22)   | 30 |
| Bixafen              | 233 | 14.53 | 414   | 394(12)   | 266(18)   | 30 |
| Spiromesifen         | 234 | 17.4  | 393   | 295(14)   | 361(10)   | 30 |
| Chlorantraniliprole  | 235 | 7.88  | 481.7 | 284(12)   | 451(14)   | 30 |
| Chlorthiamid         | 236 | 4.7   | 206   | 189(16)   | 153.8(30) | 30 |
| Fuberidazole         | 237 | 3.35  | 185   | 157(22)   | 130(22)   | 30 |
| Imazosulfuron        | 238 | 10.65 | 413   | 153(10)   | 156(20)   | 30 |
| Triasulfuron         | 239 | 5.48  | 402   | 141(18)   | 167(16)   | 30 |
| Dimoxystrobin        | 240 | 14.31 | 327.1 | 116(20)   | 205(12)   | 30 |
| Cyromazine           | 241 | 1.14  | 167.1 | 124.7(16) | 107.8(16) | 30 |
| Fluopicolide         | 242 | 10.39 | 383   | 173(16)   | 145(46)   | 30 |
| Triforine            | 243 | 8.65  | 433   | 387.8(10) | 213(24)   | 30 |
| Clodinafop-propargyl | 244 | 14.39 | 350   | 266(12)   | 90.8(28)  | 30 |
| Prosulfuron          | 245 | 10.11 | 420.1 | 140.8(16) | 167(16)   | 30 |
| Fenitrothion         | 246 | 11.09 | 278   | 108.8(18) | 125(18)   | 30 |
| Oxamyl               | 247 | 2.78  | 242.1 | 71.7(14)  | 120.7(12) | 30 |
| Azimsulfuron         | 248 | 7.24  | 425.1 | 182(14)   | 156(32)   | 30 |
| Aldicarb             | 249 | 5     | 213   | 89(12)    | 115.8(8)  | 30 |

|                           |     |       |       |           |          |    |
|---------------------------|-----|-------|-------|-----------|----------|----|
| Simazine                  | 250 | 5.63  | 202.1 | 131.8(16) | 124(16)  | 30 |
| Pethoxamid                | 251 | 12.69 | 296.1 | 131(16)   | 250(12)  | 30 |
| Phoxim                    | 252 | 15.27 | 299   | 76.7(22)  | 129(6)   | 30 |
| Metconazole               | 253 | 15.39 | 320.1 | 69.7(18)  | 125(36)  | 30 |
| Flurprimidol              | 254 | 10.87 | 313.1 | 80.6(22)  | 270(12)  | 30 |
| Indole-3-butyric acid     | 255 | 6.09  | 204.1 | 186(12)   | 130(22)  | 30 |
| EthylIndole-3-carboxylate | 256 | 7.05  | 190.1 | 162(8)    | 118(14)  | 30 |
| 3-Indolylacetic acid      | 257 | 4.78  | 176   | 130(12)   | 103(26)  | 30 |
| Mepiquat chloride         | 258 | 0.83  | 114   | 98(18)    | 57.8(16) | 30 |

(a) Collision energy (eV) is given in parentheses

**Table S4** Porosity properties and saturation magnetization values of Fe<sub>3</sub>O<sub>4</sub>, H-MOF<sub>1</sub>@Fe<sub>3</sub>O<sub>4</sub>, H-MOF<sub>6</sub>@Fe<sub>3</sub>O<sub>4</sub>, H-MOF<sub>15</sub>@Fe<sub>3</sub>O<sub>4</sub>, and H-MOF<sub>30</sub>@Fe<sub>3</sub>O<sub>4</sub> core shell magnetic nanospheres

|                                                    | Fe <sub>3</sub> O <sub>4</sub> | H-MOF <sub>1</sub> @Fe <sub>3</sub> O <sub>4</sub> | H-MOF <sub>6</sub> @Fe <sub>3</sub> O <sub>4</sub> | H-MOF <sub>15</sub> @Fe <sub>3</sub> O <sub>4</sub> | H-MOF <sub>30</sub> @Fe <sub>3</sub> O <sub>4</sub> |
|----------------------------------------------------|--------------------------------|----------------------------------------------------|----------------------------------------------------|-----------------------------------------------------|-----------------------------------------------------|
| S <sub>BET</sub> [m <sup>2</sup> g <sup>-1</sup> ] | 20.18                          | 45.89                                              | 302.94                                             | 496.29                                              | 794.32                                              |
| V[cm <sup>3</sup> g <sup>-1</sup> ]                | /                              | 0.021                                              | 0.113                                              | 0.227                                               | 0.514                                               |
| M <sub>s</sub> [emu g <sup>-1</sup> ]              | 41.73                          | 39.46                                              | 33.27                                              | 30.62                                               | 26.56                                               |

**Table S5** Properties of the analytes we selected (n-octanol-water partition coefficient ( $\log K_{ow}$ ), dissociation constant ( $pK_a$ ), CAS No., molecular formula, molecular structures and calculated sizes of the selected chemical hazards)

| Analytes                                     | Serial number | pKa        | Log KOW | CAS No.    | Molecular Formula                                 | Molecular Structures                                                                  | Calculated Size of the Analytes |
|----------------------------------------------|---------------|------------|---------|------------|---------------------------------------------------|---------------------------------------------------------------------------------------|---------------------------------|
| 3-Hydroxycarbofuran                          | 1             | 12.28±0.46 | 0.76    | 16655-82-6 | C <sub>12</sub> H <sub>15</sub> NO <sub>4</sub>   | 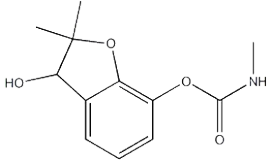   | 6.8 Å × 8.7 Å                   |
| 4-Bromo-3,5-dimethylphenyl-N-methylcarbamate | 2             | 11.85±0.46 | 3.16    | 672-99-1   | C <sub>10</sub> H <sub>12</sub> BrNO <sub>2</sub> |    | 5.9 Å × 9.0 Å                   |
| Fenpropidin                                  | 3             | 10.1       | 6.42    | 67306-00-7 | C <sub>19</sub> H <sub>31</sub> N                 |   | 8.2 Å × 8.8 Å                   |
| Fenoxycarb                                   | 4             | 12.13±0.46 | -0.15   | 72490-01-8 | C <sub>11</sub> H <sub>15</sub> NO <sub>3</sub>   |  | 8.3 Å × 8.7 Å                   |

|                |    |            |      |            |                                                                              |                                                                                       |                 |
|----------------|----|------------|------|------------|------------------------------------------------------------------------------|---------------------------------------------------------------------------------------|-----------------|
| Dichlofenthion | 5  |            | 5.14 | 97-17-6    | C <sub>10</sub> H <sub>13</sub> Cl <sub>2</sub> O <sub>3</sub> PS            | 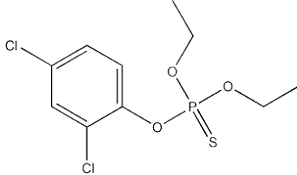   | 6.9 Å × 8.8 Å   |
| Trichlorfon    | 6  | 6          | 0.51 | 52-68-6    | C <sub>4</sub> H <sub>8</sub> Cl <sub>3</sub> O <sub>4</sub> P               |    | 5.0 Å × 5.9 Å   |
| Propachlor     | 7  | 0.30±0.50  | 2.18 | 1918-16-7  | C <sub>11</sub> H <sub>14</sub> ClNO                                         |    | 6.4 Å × 7.2 Å   |
| Dioxathion     | 8  |            | 3.45 | 78-34-2    | C <sub>12</sub> H <sub>26</sub> O <sub>6</sub> P <sub>2</sub> S <sub>4</sub> |    | 12.4 Å × 15.5 Å |
| Tebuthiuron    | 9  | 13.36±0.46 | 1.79 | 34014-18-1 | C <sub>9</sub> H <sub>16</sub> N <sub>4</sub> OS                             |   | 5.0 Å × 10.5 Å  |
| Lontrel        | 10 | 2.02±0.25  | 1.06 | 1702-17-6  | C <sub>6</sub> H <sub>3</sub> Cl <sub>2</sub> NO <sub>2</sub>                |  | 5.5 Å × 6.8 Å   |

|               |    |            |       |             |                                                                              |                                                                                       |                 |
|---------------|----|------------|-------|-------------|------------------------------------------------------------------------------|---------------------------------------------------------------------------------------|-----------------|
| Dinotefuran   | 11 | 3.24±0.50  | -0.19 | 165252-70-0 | C <sub>7</sub> H <sub>14</sub> N <sub>4</sub> O <sub>3</sub>                 | 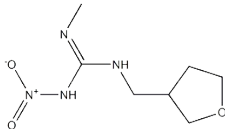   | 6.4 Å × 8.3 Å   |
| Furanthiocarb | 12 | -2.17±0.70 | 4.09  | 65907-30-4  | C <sub>18</sub> H <sub>26</sub> N <sub>2</sub> O <sub>5</sub> S              |    | 9.9 Å × 12.8 Å  |
| Bioallethrin  | 13 |            | 4.78  | 28057-48-9  | C <sub>19</sub> H <sub>26</sub> O <sub>3</sub>                               |    | 5.4 Å × 7.3 Å   |
| Asulam        | 14 | 4.82       | -0.27 | 3337-71-1   | C <sub>8</sub> H <sub>10</sub> N <sub>2</sub> O <sub>4</sub> S               |    | 7.5 Å × 10.2 Å  |
| Griseofulvin  | 15 |            | -0.31 | 126-07-8    | C <sub>17</sub> H <sub>17</sub> ClO <sub>6</sub>                             |   | 7.3 Å × 12.3 Å  |
| Sulfosulfuron | 16 | 11.87±0.70 | 0.99  | 141776-32-1 | C <sub>16</sub> H <sub>18</sub> N <sub>6</sub> O <sub>7</sub> S <sub>2</sub> |  | 12.3 Å × 13.7 Å |

|              |    |            |      |             |                                                                                |                                                                                       |                 |
|--------------|----|------------|------|-------------|--------------------------------------------------------------------------------|---------------------------------------------------------------------------------------|-----------------|
| Benoxacor    | 17 | 1.20±0.40  | 2.7  | 98730-04-2  | C <sub>11</sub> H <sub>11</sub> Cl <sub>2</sub> NO <sub>2</sub>                | 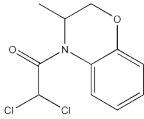   | 6.8 Å × 7.9 Å   |
| Bromuconazol | 18 | 2.75±0.10  | 3.24 | 116255-48-2 | C <sub>13</sub> H <sub>12</sub> BrCl <sub>2</sub> N <sub>3</sub><br>O          |    | 6.7 Å × 8.0 Å   |
| Butafenacil  | 19 | -4.21±0.40 | 3.05 | 134605-64-4 | C <sub>20</sub> H <sub>18</sub> ClF <sub>3</sub> N <sub>2</sub> O <sub>6</sub> |    | 9.1 Å × 15.7 Å  |
| Thiodicarb   | 20 |            | 1.7  | 59669-26-0  | C <sub>10</sub> H <sub>18</sub> N <sub>4</sub> O <sub>4</sub> S <sub>3</sub>   |   | 10.2 Å × 13.0 Å |
| Mesurool     | 21 | 12.16±0.46 | 2.92 | 2032-65-7   | C <sub>11</sub> H <sub>15</sub> NO <sub>2</sub> S                              |  | 5.7 Å × 9.1 Å   |



|               |    |                  |      |             |                          |                                                                                       |                                            |
|---------------|----|------------------|------|-------------|--------------------------|---------------------------------------------------------------------------------------|--------------------------------------------|
| Flazasulfuron | 22 | 4.6              | 1.08 | 104040-78-0 | $C_{13}H_{12}F_3N_5O_5S$ | 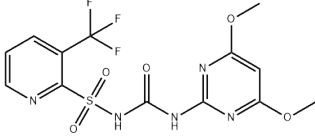   | $10.9 \text{ \AA} \times 12.7 \text{ \AA}$ |
| Methomyl      | 23 |                  | 0.6  | 16752-77-5  | $C_5H_{10}N_2O_2S$       |    | $6.3 \text{ \AA} \times 7.9 \text{ \AA}$   |
| Aminocarb     | 24 |                  | 1.9  | 2032-59-9   | $C_{11}H_{16}N_2O_2$     |    | $6.5 \text{ \AA} \times 8.9 \text{ \AA}$   |
| Ethofenprox   | 25 |                  | 7.05 | 80844-07-1  | $C_{25}H_{28}O_3$        |    | $10.6 \text{ \AA} \times 10.9 \text{ \AA}$ |
| Promecarb     | 26 | $12.37 \pm 0.46$ | 3.1  | 2631-37-0   | $C_{12}H_{17}NO_2$       |  | $7.1 \text{ \AA} \times 8.4 \text{ \AA}$   |
| Benodanil     | 27 | $12.87 \pm 0.70$ | 3.87 | 15310-01-7  | $C_{13}H_{10}INO$        |  | $7.5 \text{ \AA} \times 10.1 \text{ \AA}$  |

|              |    |            |      |             |                                                                                |                                                                                       |                 |
|--------------|----|------------|------|-------------|--------------------------------------------------------------------------------|---------------------------------------------------------------------------------------|-----------------|
| Mecarbam     | 28 |            | 2.29 | 2595-54-2   | C <sub>10</sub> H <sub>20</sub> NO <sub>3</sub> PS <sub>2</sub>                | 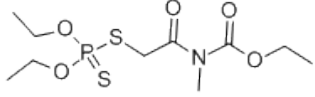   | 10.2 Å × 12.3 Å |
| Diphenamid   | 29 | -0.68±0.70 | 2.86 | 957-51-7    | C <sub>16</sub> H <sub>17</sub> NO                                             |    | 8.1 Å × 8.6 Å   |
| Triflumuron  | 30 | 9.79±0.46  | 4.91 | 64628-44-0  | C <sub>15</sub> H <sub>10</sub> ClF <sub>3</sub> N <sub>2</sub> O <sub>3</sub> |    | 5.8 Å × 13.9 Å  |
| Tricyclazole | 31 | 2.40±0.40  | 2.08 | 41814-78-2  | C <sub>9</sub> H <sub>7</sub> N <sub>3</sub> S                                 |    | 5.8 Å × 7.4 Å   |
| Propamocarb  | 32 | 12.73±0.46 | 1.12 | 24579-73-5  | C <sub>9</sub> H <sub>20</sub> N <sub>2</sub> O <sub>2</sub>                   |    | 7.3 Å × 12.4 Å  |
| Cymoxanil    | 33 | 9.7        | 4.24 | 57966-95-7  | C <sub>7</sub> H <sub>10</sub> N <sub>4</sub> O <sub>3</sub>                   |   | 4.8 Å × 12.3 Å  |
| Etoxazole    | 34 | 2.04±0.70  | 7.21 | 153233-91-1 | C <sub>21</sub> H <sub>23</sub> F <sub>2</sub> NO <sub>2</sub>                 |  | 8.9 Å × 12.2 Å  |

|                    |    |            |       |            |                                                                |                                                                                       |                |
|--------------------|----|------------|-------|------------|----------------------------------------------------------------|---------------------------------------------------------------------------------------|----------------|
| Altrenogest        | 35 | 14.59±0.40 | 3.94  | 850-52-2   | C <sub>21</sub> H <sub>26</sub> O <sub>2</sub>                 | 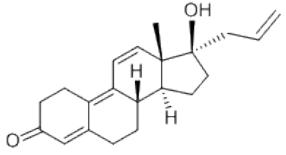   | 8.4 Å × 10.6 Å |
| Tolfenamic acid    | 36 | 3.66±0.36  | 5.17  | 13710-19-5 | C <sub>14</sub> H <sub>12</sub> ClNO <sub>2</sub>              |    | 6.6 Å × 9.1 Å  |
| Aldicarb-sulfone   | 37 | 13.44±0.46 | -0.57 | 1646-88-4  | C <sub>7</sub> H <sub>14</sub> N <sub>2</sub> O <sub>4</sub> S |    | 4.3 Å × 10.8 Å |
| Aldicarb sulfoxide | 38 | 13.57±0.46 | -0.78 | 1646-87-3  | C <sub>7</sub> H <sub>14</sub> N <sub>2</sub> O <sub>3</sub> S |    | 7.0 Å × 9.6 Å  |
| DEF 6              | 39 |            | 5.7   | 78-48-8    | C <sub>12</sub> H <sub>27</sub> OPS <sub>3</sub>               |   | 9.1 Å × 15.5 Å |
| Carboxin           | 40 | 14.31±0.70 | 2.14  | 5234-68-4  | C <sub>12</sub> H <sub>13</sub> NO <sub>2</sub> S              |  | 7.0 Å × 10.6 Å |

|               |    |            |       |            |                                                                             |                                                                                       |                |
|---------------|----|------------|-------|------------|-----------------------------------------------------------------------------|---------------------------------------------------------------------------------------|----------------|
| Methoprene    | 41 |            | 5.5   | 40596-69-8 | C <sub>19</sub> H <sub>34</sub> O <sub>3</sub>                              | 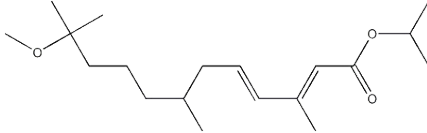   | 8.5 Å × 12.7 Å |
| EPTC          | 42 | -1.22±0.70 | 3.21  | 759-94-4   | C <sub>9</sub> H <sub>19</sub> NOS                                          |    | 9.2 Å × 9.4 Å  |
| Ethiofencarb  | 43 | 12.09±0.46 | -2.04 | 29973-13-5 | C <sub>11</sub> H <sub>15</sub> NO <sub>2</sub> S                           |    | 7.7 Å × 8.2 Å  |
| Ethion        | 44 |            | 5.07  | 563-12-2   | C <sub>9</sub> H <sub>22</sub> O <sub>4</sub> P <sub>2</sub> S <sub>4</sub> |    | 6.5 Å × 15.6 Å |
| Diethofencarb | 45 | 12.75±0.70 | 2.91  | 87130-20-9 | C <sub>14</sub> H <sub>21</sub> NO <sub>4</sub>                             |   | 7.7 Å × 12.0 Å |
| Triallate     | 46 | -1.48±0.70 | 4.6   | 2303-17-5  | C <sub>10</sub> H <sub>16</sub> Cl <sub>3</sub> NOS                         |  | 6.7 Å × 9.2 Å  |

|               |    |            |       |             |                                                                         |                                                                                       |                 |
|---------------|----|------------|-------|-------------|-------------------------------------------------------------------------|---------------------------------------------------------------------------------------|-----------------|
| mandestrobin  | 47 | 14.62±0.46 | 3.54  | 173662-97-0 | C <sub>19</sub> H <sub>23</sub> NO <sub>3</sub>                         | 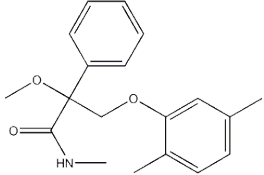   | 8.4 Å × 10.5 Å  |
| valifenalate  | 48 | 11.35±0.46 | 2.97  | 283159-90-0 | C <sub>19</sub> H <sub>27</sub> ClN <sub>2</sub> O <sub>5</sub>         |    | 9.5 Å × 9.5 Å   |
| Chlormequat   | 49 |            | -3.44 | 7003-89-6   | (ClCH <sub>2</sub> CH <sub>2</sub> N(CH <sub>3</sub> ) <sub>3</sub> )Cl |    | 4.7 Å × 7.3 Å   |
| Fenpyrazamine | 50 | 3.22±0.20  | 1.81  | 473798-59-3 | C <sub>17</sub> H <sub>21</sub> N <sub>3</sub> O <sub>2</sub> S         |   | 10.0 Å × 10.4 Å |
| Fenthion      | 51 |            | 4.09  | 55-38-9     | C <sub>10</sub> H <sub>15</sub> O <sub>3</sub> PS <sub>2</sub>          |  | 8.5 Å × 9.2 Å   |

|                |    |            |      |             |                                                                                     |                                                                                       |                 |
|----------------|----|------------|------|-------------|-------------------------------------------------------------------------------------|---------------------------------------------------------------------------------------|-----------------|
| Aclonifen      | 52 | -3.15±0.25 | 4.04 | 74070-46-5  | C <sub>12</sub> H <sub>9</sub> ClN <sub>2</sub> O <sub>3</sub>                      | 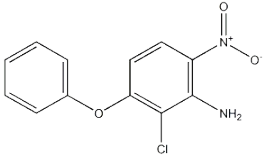   | 5.2 Å × 9.5 Å   |
| Difenoconazole | 53 | 2.94±0.12  | 4.3  | 119446-68-3 | C <sub>19</sub> H <sub>17</sub> Cl <sub>2</sub> N <sub>3</sub> O <sub>3</sub>       |    | 8.5 Å × 12.8 Å  |
| Phenothrin     | 54 |            | 7.54 | 26002-80-2  | C <sub>23</sub> H <sub>26</sub> O <sub>3</sub>                                      |    | 10.7 Å × 12.7 Å |
| Saflufenacil   | 55 | 4.24±0.40  |      | 372137-35-4 | C <sub>17</sub> H <sub>17</sub> ClF <sub>4</sub> N <sub>4</sub> O <sub>5</sub><br>S |   | 9.3 Å × 13.6 Å  |
| Zoxamide       | 56 | 11.20±0.46 | 4.35 | 156052-68-5 | C <sub>14</sub> H <sub>16</sub> Cl <sub>3</sub> NO <sub>2</sub>                     |  | 8.2 Å × 10.1 Å  |

|                  |    |            |      |             |                                                                                      |                                                                                       |                |
|------------------|----|------------|------|-------------|--------------------------------------------------------------------------------------|---------------------------------------------------------------------------------------|----------------|
| Fenamiphos       | 57 |            | 3.23 | 22224-92-6  | C <sub>13</sub> H <sub>22</sub> NO <sub>3</sub> PS                                   | 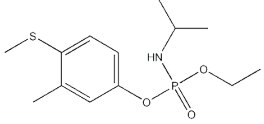   | 8.0 Å × 9.7 Å  |
| Pyraflufen Ethyl | 58 | -2.79±0.10 | 4.09 | 129630-19-9 | C <sub>15</sub> H <sub>13</sub> Cl <sub>2</sub> F <sub>3</sub> N <sub>2</sub> O<br>4 |    | 8.3 Å × 13.7 Å |
| pyriproxyfen     | 59 | 3.2        | 5.55 | 95737-68-1  | C <sub>20</sub> H <sub>19</sub> NO <sub>3</sub>                                      |    | 9.7 Å × 10.2 Å |
| Haloxyfop        | 60 | 3.12±0.10  | 3.38 | 69806-34-4  | C <sub>15</sub> H <sub>11</sub> ClF <sub>3</sub> NO <sub>4</sub>                     |    | 6.4 Å × 13.0 Å |
| Isopyrazam       | 61 | 12.27±0.40 |      | 881685-58-1 | C <sub>20</sub> H <sub>23</sub> F <sub>2</sub> N <sub>3</sub> O                      |   | 8.1 Å × 10.8 Å |
| Resmethrin       | 62 |            | 6.14 | 10453-86-8  | C <sub>22</sub> H <sub>26</sub> O <sub>3</sub>                                       |  | 7.4 Å × 13.6 Å |

|                         |    |                  |      |             |                          |                                                                                       |                                            |
|-------------------------|----|------------------|------|-------------|--------------------------|---------------------------------------------------------------------------------------|--------------------------------------------|
| Propoxycarbazone-sodium | 63 | 2.1              |      | 181274-15-7 | $C_{15}H_{17}N_4NaO_7S$  | 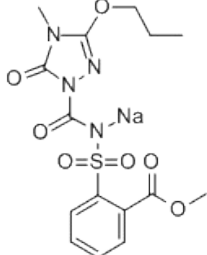   | $8.3 \text{ \AA} \times 9.7 \text{ \AA}$   |
| Propiconazole           | 64 | $2.94 \pm 0.12$  | 3.72 | 60207-90-1  | $C_{15}H_{17}Cl_2N_3O_2$ |    | $8.7 \text{ \AA} \times 9.4 \text{ \AA}$   |
| Prothioconazole         | 65 | 6.9              | 3.09 | 178928-70-6 | $C_{14}H_{15}Cl_2N_3OS$  |    | $8.5 \text{ \AA} \times 9.4 \text{ \AA}$   |
| Oxadiargyl              | 66 | $-2.99 \pm 0.40$ | 3.95 | 39807-15-3  | $C_{15}H_{14}Cl_2N_2O_3$ |   | $9.3 \text{ \AA} \times 13.2 \text{ \AA}$  |
| Flumioxazin             | 67 | $-0.01 \pm 0.20$ | 2.55 | 103361-09-7 | $C_{19}H_{15}FN_2O_4$    |  | $10.8 \text{ \AA} \times 13.2 \text{ \AA}$ |



|                |    |            |      |             |                                                                 |                                                                                       |                |
|----------------|----|------------|------|-------------|-----------------------------------------------------------------|---------------------------------------------------------------------------------------|----------------|
| Iprovalicarb   | 68 | 11.41±0.46 | 3.33 | 140923-17-7 | C <sub>18</sub> H <sub>28</sub> N <sub>2</sub> O <sub>3</sub>   | 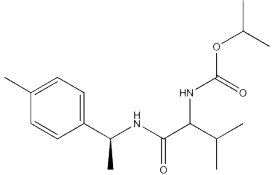   | 8.4 Å × 9.0 Å  |
| Methacrifos    | 69 |            | 1.53 | 62610-77-9  | C <sub>7</sub> H <sub>13</sub> O <sub>5</sub> PS                |    | 8.0 Å × 8.4 Å  |
| Isoprothiolane | 70 |            | 2.88 | 50512-35-1  | C <sub>12</sub> H <sub>18</sub> O <sub>4</sub> S <sub>2</sub>   |    | 8.2 Å × 9.9 Å  |
| Tepraloxymim   | 71 | 4.24±0.25  |      | 149979-41-9 | C <sub>17</sub> H <sub>24</sub> ClNO <sub>4</sub>               |   | 7.5 Å × 14.2 Å |
| Diuron         | 72 | -1 to -2   | 2.68 | 330-54-1    | C <sub>9</sub> H <sub>10</sub> Cl <sub>2</sub> N <sub>2</sub> O |  | 5.3 Å × 8.0 Å  |

|                     |    |            |      |             |                                                                  |                                                                                       |                |
|---------------------|----|------------|------|-------------|------------------------------------------------------------------|---------------------------------------------------------------------------------------|----------------|
| Anilazine           | 73 | 0.43±0.10  | 3.88 | 101-05-3    | C <sub>9</sub> H <sub>5</sub> Cl <sub>3</sub> N <sub>4</sub>     | 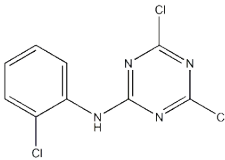   | 6.3 Å × 8.6 Å  |
| Iodosulfuron-methyl | 74 | 3.22       |      | 144550-36-7 | C <sub>14</sub> H <sub>14</sub> IN <sub>5</sub> O <sub>6</sub> S |    | 8.4 Å × 14.3 Å |
| Daminozide          | 75 | 5.59±0.10  | -1.5 | 1596-84-5   | C <sub>6</sub> H <sub>12</sub> N <sub>2</sub> O <sub>3</sub>     |    | 7.7 Å × 8.0 Å  |
| Acetamiprid         | 76 | -0.44±0.10 | 2.55 | 135410-20-7 | C <sub>10</sub> H <sub>11</sub> ClN <sub>4</sub>                 |   | 5.8 Å × 8.4 Å  |
| Picoxystrobin       | 77 | -1.09±0.24 | 3.67 | 117428-22-5 | C <sub>18</sub> H <sub>16</sub> F <sub>3</sub> NO <sub>4</sub>   |  | 9.6 Å × 13.2 Å |

|               |    |            |      |             |                                                                              |                                                                                       |                |
|---------------|----|------------|------|-------------|------------------------------------------------------------------------------|---------------------------------------------------------------------------------------|----------------|
| Carbendazim   | 78 | 4.48       | 1.52 | 10605-21-7  | C <sub>9</sub> H <sub>9</sub> N <sub>3</sub> O <sub>2</sub>                  | 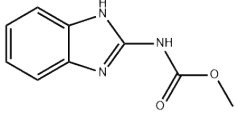   | 6.6 Å × 8.0 Å  |
| Sandofan      | 79 | 1.16±0.20  | 0.8  | 77732-09-3  | C <sub>14</sub> H <sub>18</sub> N <sub>2</sub> O <sub>4</sub>                |    | 7.9 Å × 8.0 Å  |
| Diphenylamine | 80 | 0.79       | 3.5  | 122-39-4    | C <sub>12</sub> H <sub>11</sub> N                                            |    | 5.0 Å × 9.4 Å  |
| Diazinon      | 81 | 1.21±0.30  | 3.81 | 333-41-5    | C <sub>12</sub> H <sub>21</sub> N <sub>2</sub> O <sub>3</sub> PS             |    | 7.4 Å × 9.2 Å  |
| Flutriafol    | 82 | 11.60±0.29 | 2.29 | 76674-21-0  | C <sub>16</sub> H <sub>13</sub> F <sub>2</sub> N <sub>3</sub> O              |   | 7.3 Å × 9.0 Å  |
| Rimsulfuron   | 83 | 4.1        | 0.03 | 122931-48-0 | C <sub>14</sub> H <sub>17</sub> N <sub>5</sub> O <sub>7</sub> S <sub>2</sub> |  | 7.5 Å × 10.8 Å |

|             |    |            |      |             |                             |                                                                                       |  |  |  |                 |
|-------------|----|------------|------|-------------|-----------------------------|---------------------------------------------------------------------------------------|--|--|--|-----------------|
|             |    |            |      |             |                             |                                                                                       |  |  |  | 7.4 Å × 8.6 Å   |
| Phosalone   | 84 | -1.75±0.20 | 3.68 | 2310-17-0   | $C_{12}H_{15}ClNO_4PS$<br>2 | 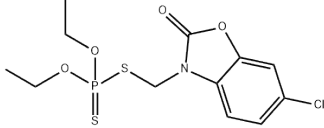   |  |  |  |                 |
| Fluvalinate | 85 | -1.16±0.50 |      | 102851-06-9 | $C_{26}H_{22}ClF_3N_2O_3$   |    |  |  |  | 9.2 Å × 13.3 Å  |
| Fluopyram   | 86 |            | 4.78 | 658066-35-4 | $C_{16}H_{11}ClF_6N_2O$     |    |  |  |  | 10.0 Å × 12.4 Å |
| Fluazinam   | 87 | 7.11       | 3.56 | 79622-59-6  | $C_{13}H_4Cl_2F_6N_4O_4$    |   |  |  |  | 8.0 Å × 10.6 Å  |
| Sulfoxaflor | 88 |            | 3.14 | 946578-00-3 | $C_{10}H_{10}F_3N_3OS$      |  |  |  |  | 5.3 Å × 9.6 Å   |

|               |    |            |      |             |                                                                                 |                                                                                       |                |
|---------------|----|------------|------|-------------|---------------------------------------------------------------------------------|---------------------------------------------------------------------------------------|----------------|
| Flonicamid    | 89 | 10.99±0.46 | 0.5  | 158062-67-0 | C <sub>9</sub> H <sub>6</sub> F <sub>3</sub> N <sub>3</sub> O                   | 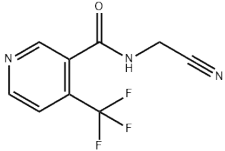   | 5.7 Å × 8.9 Å  |
| Flusilazole   | 90 | 2.5        | 3.7  | 85509-19-9  | C <sub>16</sub> H <sub>15</sub> F <sub>2</sub> N <sub>3</sub> Si                |    | 7.8 Å × 8.9 Å  |
| Epoxiconazole | 91 | 2.75±0.10  | 3.44 | 135319-73-2 | C <sub>17</sub> H <sub>13</sub> ClFN <sub>3</sub> O                             |    | 7.6 Å × 8.2 Å  |
| Tetraconazole | 92 | 2.68±0.10  | 3.56 | 112281-77-3 | C <sub>13</sub> H <sub>11</sub> Cl <sub>2</sub> F <sub>4</sub> N <sub>3</sub> O |   | 7.9 Å × 9.9 Å  |
| Flucythrinate | 93 |            | 6.2  | 70124-77-5  | C <sub>26</sub> H <sub>23</sub> F <sub>2</sub> NO <sub>4</sub>                  |  | 9.5 Å × 14.6 Å |

|               |    |            |      |             |                                                                                |                                                                                       |                |
|---------------|----|------------|------|-------------|--------------------------------------------------------------------------------|---------------------------------------------------------------------------------------|----------------|
| Flufenacet    | 94 | 0.31±0.50  | 3.2  | 142459-58-3 | C <sub>14</sub> H <sub>13</sub> F <sub>4</sub> N <sub>3</sub> O <sub>2</sub> S | 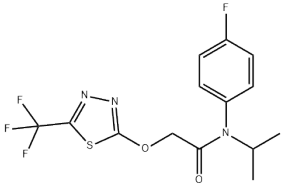   | 7.1 Å × 12.1 Å |
| Flutolanil    | 95 | 12.44±0.70 | 3.7  | 66332-96-5  | C <sub>17</sub> H <sub>16</sub> F <sub>3</sub> NO <sub>2</sub>                 |    | 8.5 Å × 10.8 Å |
| Procymidone   | 96 | -2.67±0.60 | 3.08 | 32809-16-8  | C <sub>13</sub> H <sub>11</sub> Cl <sub>2</sub> NO <sub>2</sub>                |    | 7.8 Å × 9.1 Å  |
| Thiobencarb   | 97 | -1.26±0.70 | 3.4  | 28249-77-6  | C <sub>12</sub> H <sub>16</sub> ClNOS                                          |    | 8.2 Å × 10.0 Å |
| Molinate      | 98 | -1.22±0.20 | 3.21 | 2212-67-1   | C <sub>9</sub> H <sub>17</sub> NOS                                             |  | 6.6 Å × 7.9 Å  |
| Cyproconazole | 99 | 12.59±0.29 | 2.9  | 94361-06-5  | C <sub>15</sub> H <sub>18</sub> ClN <sub>3</sub> O                             |  | 6.7 Å × 9.7 Å  |

|                |     |            |      |             |                                                                                 |                                                                                      |                |
|----------------|-----|------------|------|-------------|---------------------------------------------------------------------------------|--------------------------------------------------------------------------------------|----------------|
| Chromafenozide | 100 | 10.91±0.20 | 4.4  | 143807-66-3 | C <sub>24</sub> H <sub>30</sub> N <sub>2</sub> O <sub>3</sub>                   | 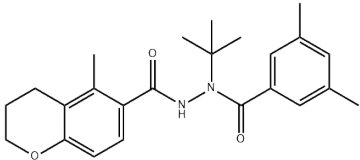  | 9.5 Å × 10.1 Å |
| Cyflufenamide  | 101 | 9.34±0.46  | 5.6  | 180409-60-3 | C <sub>20</sub> H <sub>17</sub> F <sub>5</sub> N <sub>2</sub> O <sub>2</sub>    |   | 7.7 Å × 10.4 Å |
| Sulcotrione    | 102 | 3.22±0.50  | 2.31 | 99105-77-8  | C <sub>14</sub> H <sub>13</sub> ClO <sub>5</sub> S                              |   | 9.0 Å × 9.0 Å  |
| Metosulam      | 103 | 4.28±0.50  | 3.08 | 139528-85-1 | C <sub>14</sub> H <sub>13</sub> Cl <sub>2</sub> N <sub>5</sub> O <sub>4</sub> S |  | 9.1 Å × 9.6 Å  |

|                     |     |            |      |             |                                                                                                  |                                                                                       |  |  |  |                 |
|---------------------|-----|------------|------|-------------|--------------------------------------------------------------------------------------------------|---------------------------------------------------------------------------------------|--|--|--|-----------------|
|                     |     |            |      |             |                                                                                                  |                                                                                       |  |  |  | 6.9 Å × 8.5 Å   |
| Tolylfluamide       | 104 | -5.06±0.50 | 3.9  | 731-27-1    | C <sub>10</sub> H <sub>13</sub> Cl <sub>2</sub> FN <sub>2</sub> O <sub>2</sub><br>S <sub>2</sub> | 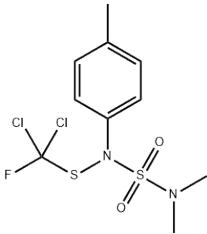   |  |  |  |                 |
| Alachlor            | 105 | 1.20±0.50  | 3.52 | 15972-60-8  | C <sub>14</sub> H <sub>20</sub> ClNO <sub>2</sub>                                                |    |  |  |  | 8.0 Å × 8.0 Å   |
| Metsulfuron methyl  | 106 | 2.55±0.10  | 2.2  | 74223-64-6  | C <sub>14</sub> H <sub>15</sub> N <sub>5</sub> O <sub>6</sub> S                                  |    |  |  |  | 9.1 Å × 9.3 Å   |
| Mesosulfuron-methyl | 107 | 4.35       |      | 208465-21-8 | C <sub>17</sub> H <sub>21</sub> N <sub>5</sub> O <sub>9</sub> S <sub>2</sub>                     |   |  |  |  | 10.5 Å × 12.8 Å |
| Tolclofos-methyl    | 108 |            | 4.56 | 57018-04-9  | C <sub>9</sub> H <sub>11</sub> Cl <sub>2</sub> O <sub>3</sub> PS                                 |  |  |  |  | 8.0 Å × 8.3 Å   |



|                    |     |            |      |             |                                                                              |                                                                                       |               |
|--------------------|-----|------------|------|-------------|------------------------------------------------------------------------------|---------------------------------------------------------------------------------------|---------------|
| Thiophanate-methyl | 109 | 7.28       | 1.4  | 23564-05-8  | C <sub>12</sub> H <sub>14</sub> N <sub>4</sub> O <sub>4</sub> S <sub>2</sub> | 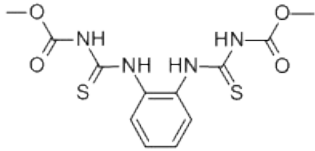   | 7.6 Å × 7.7 Å |
| Carbaryl           | 110 | 12.02±0.46 | 2.36 | 63-25-2     | C <sub>12</sub> H <sub>11</sub> NO <sub>2</sub>                              |    | 6.9 Å × 7.4 Å |
| Metalaxyl          | 111 | 1.41±0.50  | 1.65 | 57837-19-1  | C <sub>15</sub> H <sub>21</sub> NO <sub>4</sub>                              |    | 6.5 Å × 8.0 Å |
| Metazachlor        | 112 | 1.54±0.10  | 2.13 | 67129-08-2  | C <sub>14</sub> H <sub>16</sub> ClN <sub>3</sub> O                           |   | 7.8 Å × 8.0 Å |
| Tebufenozide       | 113 | 10.89±0.46 | 4.25 | 112410-23-8 | C <sub>22</sub> H <sub>28</sub> N <sub>2</sub> O <sub>2</sub>                |  | 9.8 Å × 9.9 Å |

|                        |     |            |      |                          |                                                                                                      |                                                                                       |                 |
|------------------------|-----|------------|------|--------------------------|------------------------------------------------------------------------------------------------------|---------------------------------------------------------------------------------------|-----------------|
| Famoxadone             | 114 | 0.63±0.40  | 4.65 | 131807-57-3              | C <sub>22</sub> H <sub>18</sub> N <sub>2</sub> O <sub>4</sub>                                        | 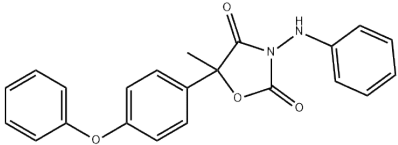   | 13.4 Å × 13.9 Å |
| Emamectin              | 115 |            |      | 119791-41-2              | C <sub>49</sub> H <sub>75</sub> NO <sub>13</sub><br>C <sub>49</sub> H <sub>77</sub> NO <sub>13</sub> |    | 15.7 Å × 25.7 Å |
| cis and trans-Diallate | 116 | -1.63±0.70 | 4.49 | 2303-16-4;<br>17708-57-5 | C <sub>10</sub> H <sub>17</sub> Cl <sub>2</sub> NOS                                                  |    | 6.0 Å × 8.8 Å   |
| Chloridazon            | 117 | 0.71±0.20  | 1.14 | 1698-60-8                | C <sub>10</sub> H <sub>8</sub> ClN <sub>3</sub> O                                                    |    | 6.2 Å × 8.6 Å   |
| Pendimethaline         | 118 | -2.24±0.33 | 2.62 | 40487-42-1               | C <sub>13</sub> H <sub>19</sub> N <sub>3</sub> O <sub>4</sub>                                        |   | 7.2 Å × 8.8 Å   |
| Trinexapac-ethyl       | 119 | 4.7        | 1.6  | 95266-40-3               | C <sub>13</sub> H <sub>16</sub> O <sub>5</sub>                                                       |  | 7.2 Å × 12.9 Å  |

|                 |     |                                 |      |             |                                                                  |                                                                                       |                |
|-----------------|-----|---------------------------------|------|-------------|------------------------------------------------------------------|---------------------------------------------------------------------------------------|----------------|
| Spirotetramat   | 120 |                                 | 3.67 | 203313-25-1 | C <sub>21</sub> H <sub>27</sub> NO <sub>5</sub>                  | 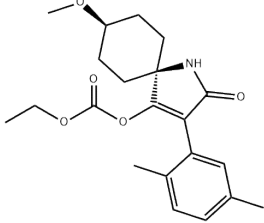   | 8.1 Å × 13.0 Å |
| Cadusafos       | 121 |                                 | 3.9  | 95465-99-9  | C <sub>10</sub> H <sub>23</sub> O <sub>2</sub> PS <sub>2</sub>   |    | 8.8 Å × 9.7 Å  |
| Quinalphos      | 122 | -1.05±0.30                      | 4.44 | 13593-03-8  | C <sub>12</sub> H <sub>15</sub> N <sub>2</sub> O <sub>3</sub> PS |    | 9.8 Å × 13.2 Å |
| Orthosulfamuron | 123 | ?1.4, 0.7,<br>3.5, 9.6,<br>11.5 | 0.14 | 213464-77-8 | C <sub>16</sub> H <sub>20</sub> N <sub>6</sub> O <sub>6</sub> S  |   | 9.5 Å × 13.3 Å |
| Cyhalofop-butyl | 124 |                                 | 4.47 | 122008-85-9 | C <sub>20</sub> H <sub>20</sub> FNO <sub>4</sub>                 |  | 9.5 Å × 13.3 Å |

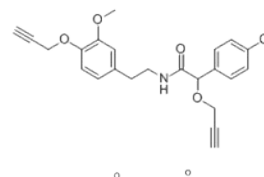

|               |     |            |      |             |                                                                               |                                                                                      |                |
|---------------|-----|------------|------|-------------|-------------------------------------------------------------------------------|--------------------------------------------------------------------------------------|----------------|
| Cyazofamid    | 125 | -6.61±0.70 | 2.87 | 120116-88-3 | C <sub>13</sub> H <sub>13</sub> ClN <sub>4</sub> O <sub>2</sub> S             | 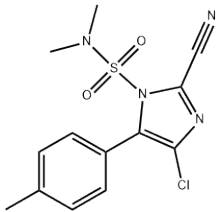  | 7.3 Å × 9.8 Å  |
| Lactofen      | 126 |            | 4.81 | 77501-63-4  | C <sub>19</sub> H <sub>15</sub> ClF <sub>3</sub> NO <sub>7</sub>              |   | 8.0 Å × 14.3 Å |
| Florasulam    | 127 | 4.54       | 2.13 | 145701-23-1 | C <sub>12</sub> H <sub>8</sub> F <sub>3</sub> N <sub>5</sub> O <sub>3</sub> S |   | 6.8 Å × 8.9 Å  |
| Mandipropamid | 128 |            | 3.57 | 374726-62-2 | C <sub>23</sub> H <sub>22</sub> ClNO <sub>4</sub>                             |  | 9.5 Å × 16.8 Å |

|                   |     |            |       |             |                                                               |                                                                                     |               |
|-------------------|-----|------------|-------|-------------|---------------------------------------------------------------|-------------------------------------------------------------------------------------|---------------|
| Mesotrione        | 129 | 3.12       | 1.49  | 104206-82-8 | C <sub>14</sub> H <sub>13</sub> NO <sub>7</sub> S             | 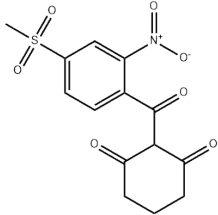 | 8.7 Å × 9.0 Å |
| Oxydemeton-methyl | 130 |            | -0.74 | 301-12-2    | C <sub>6</sub> H <sub>15</sub> O <sub>4</sub> PS <sub>2</sub> |  | 8.7 Å × 8.9 Å |
| Oxycarboxin       | 131 | 11.26±0.70 | 0.77  | 5259-88-1   | C <sub>12</sub> H <sub>13</sub> NO <sub>4</sub> S             |  | 6.3 Å × 9.0 Å |

|              |     |             |      |             |                                                  |                                                                                       |  |  |  |                 |
|--------------|-----|-------------|------|-------------|--------------------------------------------------|---------------------------------------------------------------------------------------|--|--|--|-----------------|
|              |     |             |      |             |                                                  |                                                                                       |  |  |  | 15.0 Å × 17.5 Å |
| Spinetoram L | 132 |             |      | 187166-15-0 | C <sub>43</sub> H <sub>69</sub> NO <sub>10</sub> | 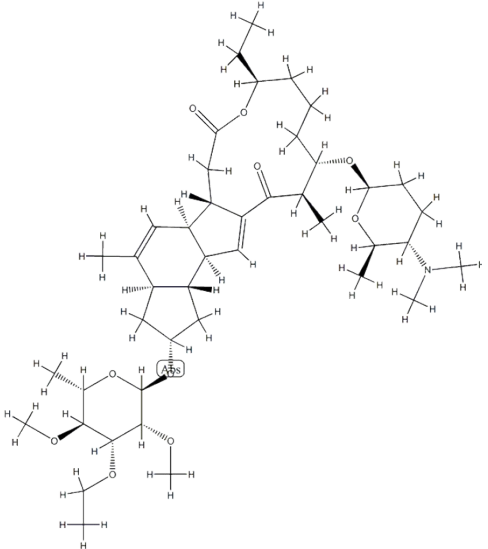   |  |  |  |                 |
| Ethirimol    | 133 | 5           | 1.71 | 23947-60-6  | C <sub>11</sub> H <sub>19</sub> N <sub>3</sub> O |    |  |  |  | 7.0 Å × 13.0 Å  |
| Ethoxyquin   | 134 | 5.02 ± 0.70 | 3.87 | 91-53-2     | C <sub>14</sub> H <sub>19</sub> NO               |  |  |  |  | 6.4 Å × 10.4 Å  |

|               |     |            |      |             |                                                                             |                                                                                       |                |
|---------------|-----|------------|------|-------------|-----------------------------------------------------------------------------|---------------------------------------------------------------------------------------|----------------|
| Propisochlor  | 135 | 1.30±0.50  | 3.5  | 86763-47-5  | C <sub>15</sub> H <sub>22</sub> ClNO <sub>2</sub>                           | 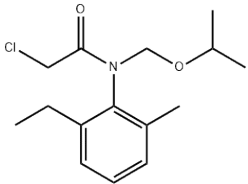   | 7.0 Å × 9.0 Å  |
| Isoproturon   | 136 | 15.06±0.70 | 2.87 | 34123-59-6  | C <sub>12</sub> H <sub>18</sub> N <sub>2</sub> O                            |    | 7.4 Å × 8.6 Å  |
| Butralin      | 137 | -3.50±0.50 | 2.95 | 33629-47-9  | C <sub>14</sub> H <sub>21</sub> N <sub>3</sub> O <sub>4</sub>               |    | 7.7 Å × 9.4 Å  |
| Azocyclotin   | 138 | 5.36       |      | 41083-11-8  | C <sub>20</sub> H <sub>35</sub> N <sub>3</sub> Sn                           |   | 9.8 Å × 10.3 Å |
| Amidosulfuron | 139 | 0.12±0.40  | 1.63 | 120923-37-7 | C <sub>9</sub> H <sub>15</sub> N <sub>5</sub> O <sub>7</sub> S <sub>2</sub> |  | 8.1 Å × 10.6 Å |

|              |     |            |      |             |                                                                |                                                                                       |                |
|--------------|-----|------------|------|-------------|----------------------------------------------------------------|---------------------------------------------------------------------------------------|----------------|
| Fentin       | 140 | 3.98±0.70  |      | 76-87-9     | C <sub>18</sub> H <sub>16</sub> OSn                            | 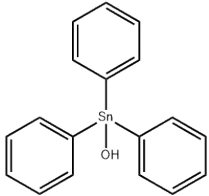   | 9.1 Å × 9.4 Å  |
| Ametoctradin | 141 |            | 4.02 | 865318-97-4 | C <sub>15</sub> H <sub>25</sub> N <sub>5</sub>                 |    | 7.4 Å × 15.3 Å |
| Atrazine     | 142 | 1.64       | 2.61 | 1912-24-9   | C <sub>8</sub> H <sub>14</sub> ClN <sub>5</sub>                |    | 6.1 Å × 10.1 Å |
| Vinclozolin  | 143 | -3.43±0.40 | 3.1  | 50471-44-8  | C <sub>12</sub> H <sub>9</sub> Cl <sub>2</sub> NO <sub>3</sub> |   | 7.3 Å × 8.8 Å  |
| Barban       | 144 | 12.30±0.70 | 3.41 | 101-27-9    | C <sub>11</sub> H <sub>9</sub> Cl <sub>2</sub> NO <sub>2</sub> |  | 6.3 Å × 10.1 Å |



|                 |     |            |      |             |                                                                         |                                                                                       |                 |
|-----------------|-----|------------|------|-------------|-------------------------------------------------------------------------|---------------------------------------------------------------------------------------|-----------------|
| Tridemorph      | 145 | 7.63±0.10  | 6.38 | 24602-86-6  | C <sub>19</sub> H <sub>39</sub> NO                                      | 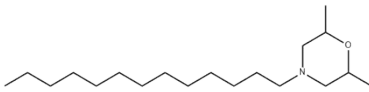   | 5.5 Å × 20.8 Å  |
| Bromophos-ethyl | 146 |            | 6.15 | 4824-78-6   | C <sub>10</sub> H <sub>12</sub> BrCl <sub>2</sub> O <sub>3</sub> P<br>S |    | 7.4 Å × 9.5 Å   |
| chloroxuron     | 147 | 14.37±0.70 | 3.7  | 1982-47-4   | C <sub>15</sub> H <sub>15</sub> ClN <sub>2</sub> O <sub>2</sub>         |    | 7.0 Å × 12.8 Å  |
| Bromopropylate  | 148 | 11.18±0.29 | 5.4  | 18181-80-1  | C <sub>17</sub> H <sub>16</sub> Br <sub>2</sub> O <sub>3</sub>          |    | 7.7 Å × 9.9 Å   |
| Nicosulfuron    | 149 | 4.6        | 0.01 | 111991-09-4 | C <sub>15</sub> H <sub>18</sub> N <sub>6</sub> O <sub>6</sub> S         |   | 8.2 Å × 8.4 Å   |
| Fenpyroximate   | 150 | 1.58±0.10  | 5.01 | 134098-61-6 | C <sub>24</sub> H <sub>27</sub> N <sub>3</sub> O <sub>4</sub>           |  | 13.4 Å × 15.8 Å |

|                  |     |           |      |             |                                                                              |                                                                                       |                 |
|------------------|-----|-----------|------|-------------|------------------------------------------------------------------------------|---------------------------------------------------------------------------------------|-----------------|
| Acequinocyl      | 151 |           | 7.21 | 57960-19-7  | C <sub>24</sub> H <sub>32</sub> O <sub>4</sub>                               | 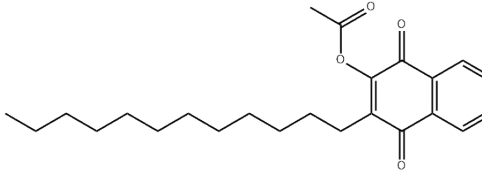   | 10.7 Å × 20.8 Å |
| Bifenazate       | 152 | 9.84±0.43 | 4.14 | 149877-41-8 | C <sub>17</sub> H <sub>20</sub> N <sub>2</sub> O <sub>3</sub>                |    | 9.2 Å × 13.4 Å  |
| Trifloxystrobin  | 153 |           | 6.62 | 141517-21-7 | C <sub>20</sub> H <sub>19</sub> F <sub>3</sub> N <sub>2</sub> O <sub>4</sub> |   | 7.9 Å × 9.6 Å   |
| Cyantraniliprole | 154 |           | 3.43 | 736994-63-1 | C <sub>19</sub> H <sub>14</sub> BrClN <sub>6</sub> O<br>2                    |  | 7.8 Å × 11.1 Å  |

|                  |     |            |       |            |                                                                 |                                                                                       |                 |
|------------------|-----|------------|-------|------------|-----------------------------------------------------------------|---------------------------------------------------------------------------------------|-----------------|
| Phosmet          | 155 | -2.63±0.20 | 2.78  | 732-11-6   | C <sub>11</sub> H <sub>12</sub> NO <sub>4</sub> PS <sub>2</sub> | 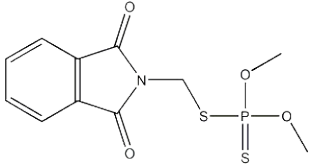   | 6.6 Å × 8.2 Å   |
| Bitertanol       | 156 | 13.40±0.20 | 4.16  | 55179-31-2 | C <sub>20</sub> H <sub>23</sub> N <sub>3</sub> O <sub>2</sub>   |    | 10.5 Å × 13.8 Å |
| Triadimenol      | 157 | 13.29±0.20 | 3.08  | 55219-65-3 | C <sub>14</sub> H <sub>18</sub> ClN <sub>3</sub> O <sub>2</sub> |    | 7.4 Å × 9.3 Å   |
| Maleic hydrazide | 158 | 9.01±0.20  | -0.84 | 123-33-1   | C <sub>4</sub> H <sub>4</sub> N <sub>2</sub> O <sub>2</sub>     |    | 4.5 Å × 5.0 Å   |
| Metolachlor      | 159 | 1.45±0.50  | 2.9   | 51218-45-2 | C <sub>15</sub> H <sub>22</sub> ClNO <sub>2</sub>               |  | 7.1 Å × 8.3 Å   |

|             |     |                  |      |             |                        |                                                                                       |                                            |
|-------------|-----|------------------|------|-------------|------------------------|---------------------------------------------------------------------------------------|--------------------------------------------|
| Triclopyr   | 160 | 2.68             | 2.53 | 55335-06-3  | $C_7H_4Cl_3NO_3$       | 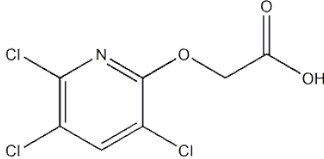   | $5.3 \text{ \AA} \times 9.3 \text{ \AA}$   |
| Fenamidone  | 161 | $0.49 \pm 0.40$  | 3.45 | 161326-34-7 | $C_{17}H_{17}N_3OS$    |    | $7.8 \text{ \AA} \times 10.0 \text{ \AA}$  |
| Novaluron   | 162 | $8.68 \pm 0.46$  | 5.27 | 116714-46-6 | $C_{17}H_9ClF_8N_2O_4$ |    | $10.2 \text{ \AA} \times 12.9 \text{ \AA}$ |
| Monolinuron | 163 | $12.80 \pm 0.70$ | 2.3  | 1746-81-2   | $C_9H_{11}ClN_2O_2$    |   | $6.7 \text{ \AA} \times 7.0 \text{ \AA}$   |
| Carbofuran  | 164 |                  | 2.32 | 1563-66-2   | $C_{12}H_{15}NO_3$     |  | $7.5 \text{ \AA} \times 7.5 \text{ \AA}$   |

|              |     |                  |      |             |                        |                                                                                       |                                            |
|--------------|-----|------------------|------|-------------|------------------------|---------------------------------------------------------------------------------------|--------------------------------------------|
| Tefluthrin   | 165 |                  |      | 79538-32-2  | $C_{17}H_{14}ClF_7O_2$ | 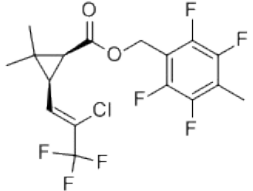   | $9.7 \text{ \AA} \times 10.7 \text{ \AA}$  |
| Buprofezin   | 166 | $3.02 \pm 0.20$  | 4.3  | 69327-76-0  | $C_{16}H_{23}N_3OS$    |    | $8.0 \text{ \AA} \times 13.8 \text{ \AA}$  |
| Dimethomorph | 167 |                  | 2.68 | 110488-70-5 | $C_{21}H_{22}ClNO_4$   |    | $12.5 \text{ \AA} \times 12.5 \text{ \AA}$ |
| Warfarin     | 168 | $4.90 \pm 0.01$  | 2.89 | 81-81-2     | $C_{19}H_{16}O_4$      |   | $8.9 \text{ \AA} \times 10.4 \text{ \AA}$  |
| Metribuzin   | 169 | $-0.16 \pm 0.20$ | 1.7  | 21087-64-9  | $C_8H_{14}N_4OS$       |  | $5.8 \text{ \AA} \times 8.5 \text{ \AA}$   |

|                 |     |            |      |             |                                                               |                                                                                       |                |
|-----------------|-----|------------|------|-------------|---------------------------------------------------------------|---------------------------------------------------------------------------------------|----------------|
| Pirimicarb      | 170 | 4.34       | 1.7  | 23103-98-2  | C <sub>11</sub> H <sub>18</sub> N <sub>4</sub> O <sub>2</sub> | 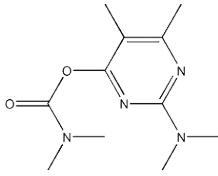   | 7.7 Å × 9.2 Å  |
| Fenbuconazole   | 171 | 2.34±0.10  | 3.23 | 114369-43-6 | C <sub>19</sub> H <sub>17</sub> ClN <sub>4</sub>              |    | 7.6 Å × 10.1 Å |
| Chlorotoluron   | 172 | 14.43±0.70 | 2.41 | 15545-48-9  | C <sub>10</sub> H <sub>13</sub> ClN <sub>2</sub> O            |    | 6.0 Å × 8.5 Å  |
| Acetochlor      | 173 | 1.29±0.50  | 3.03 | 34256-82-1  | C <sub>14</sub> H <sub>20</sub> ClNO <sub>2</sub>             |   | 7.0 Å × 8.3 Å  |
| Methoxyfenozide | 174 | 10.43±0.4  | 3.7  | 161050-58-4 | C <sub>22</sub> H <sub>28</sub> N <sub>2</sub> O <sub>3</sub> |  | 9.4 Å × 9.4 Å  |
| Amitraz         | 175 | 4.2        | 5.5  | 33089-61-1  | C <sub>19</sub> H <sub>23</sub> N <sub>3</sub>                |  | 7.5 Å × 14.9 Å |

|                 |     |            |       |             |                                                                                |                                                                                       |                 |
|-----------------|-----|------------|-------|-------------|--------------------------------------------------------------------------------|---------------------------------------------------------------------------------------|-----------------|
| Acephate        | 176 | 11.00±0.46 | -0.85 | 30560-19-1  | C <sub>4</sub> H <sub>10</sub> NO <sub>3</sub> PS                              | 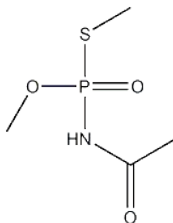   | 7.2 Å × 7.2 Å   |
| Flupyradifurone | 177 | 0.22±0.10  |       | 951659-40-8 | C <sub>12</sub> H <sub>11</sub> ClF <sub>2</sub> N <sub>2</sub> O <sub>2</sub> |    | 7.8 Å × 9.1 Å   |
| Pyrasulfotole   | 178 | 6.36±0.50  | 2.11  | 365400-11-9 | C <sub>14</sub> H <sub>13</sub> F <sub>3</sub> N <sub>2</sub> O <sub>4</sub> S |    | 7.3 Å × 9.6 Å   |
| Abamectin       | 179 |            |       | 71751-41-2  | C <sub>49</sub> H <sub>74</sub> O <sub>14</sub>                                |  | 13.6 Å × 16.2 Å |

|                           |     |            |      |              |                                                                                 |                                                                                       |                 |
|---------------------------|-----|------------|------|--------------|---------------------------------------------------------------------------------|---------------------------------------------------------------------------------------|-----------------|
| Oryzalin                  | 180 | 9.14±0.60  | 3.73 | 19044-88-3   | C <sub>12</sub> H <sub>18</sub> N <sub>4</sub> O <sub>6</sub> S                 | 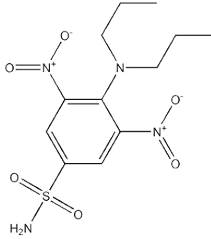   | 7.6 Å × 10.6 Å  |
| Benzovindiflupyr          | 181 | 12.12±0.20 |      | 1072957-71-1 | C <sub>18</sub> H <sub>15</sub> Cl <sub>2</sub> F <sub>2</sub> N <sub>3</sub> O |    | 9.2 Å × 9.5 Å   |
| Metrafenone               | 182 |            | 4.72 | 220899-03-6  | C <sub>19</sub> H <sub>21</sub> BrO <sub>5</sub>                                |    | 8.9 Å × 10.4 Å  |
| Benthiavalicarb isopropyl | 183 | 11.34±0.46 | 3.16 | 177406-68-7  | C <sub>18</sub> H <sub>24</sub> FN <sub>3</sub> O <sub>3</sub> S                |   | 9.0 Å × 10.7 Å  |
| Benzalkonium chloride     | 184 |            |      | 63449-41-2   | C <sub>10</sub> H <sub>16</sub> N(CH <sub>2</sub> ) <sub>7</sub> Cl             |  | 12.3 Å × 12.8 Å |



|              |     |            |       |             |                                                                  |                                                                                       |                 |
|--------------|-----|------------|-------|-------------|------------------------------------------------------------------|---------------------------------------------------------------------------------------|-----------------|
| Imidacloprid | 185 | 7.16±0.20  | -0.41 | 138261-41-3 | C <sub>9</sub> H <sub>10</sub> ClN <sub>5</sub> O <sub>2</sub>   | 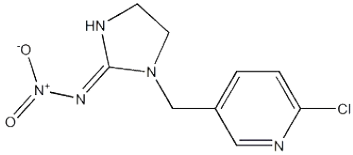   | 6.0 Å × 9.3 Å   |
| Tebufenpyrad | 186 | 13.19±0.46 | 4.61  | 119168-77-3 | C <sub>18</sub> H <sub>24</sub> ClN <sub>3</sub> O               |    | 10.1 Å × 12.8 Å |
| Penthiopyrad | 187 | 12.77±0.70 | 4.95  | 183675-82-3 | C <sub>16</sub> H <sub>20</sub> F <sub>3</sub> N <sub>3</sub> OS |    | 7.3 Å × 8.6 Å   |
| Prosulfocarb | 188 | -1.22±0.70 | 4.65  | 52888-80-9  | C <sub>14</sub> H <sub>21</sub> NOS                              |   | 6.3 Å × 6.8 Å   |
| Profenofos   | 189 |            | 4.68  | 41198-08-7  | C <sub>11</sub> H <sub>15</sub> BrClO <sub>3</sub> P<br>S        |  | 8.8 Å × 12.5 Å  |

|                 |     |            |      |             |                                                                  |                                                                                       |                 |
|-----------------|-----|------------|------|-------------|------------------------------------------------------------------|---------------------------------------------------------------------------------------|-----------------|
| Cycloxydim      | 190 | 4.32±0.25  |      | 101205-02-1 | C <sub>17</sub> H <sub>27</sub> NO <sub>3</sub> S                | 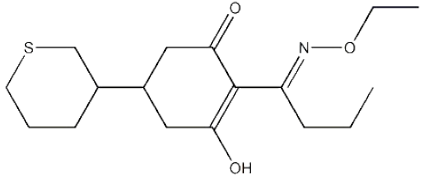   | 7.5 Å × 13.8 Å  |
| Pyridaben       | 191 | -2.69±0.20 | 6.37 | 96489-71-3  | C <sub>19</sub> H <sub>25</sub> ClN <sub>2</sub> OS              |    | 13.2 Å × 14.7 Å |
| Propanil        | 192 | 13.58±0.70 | 3.07 | 709-98-8    | C <sub>9</sub> H <sub>9</sub> Cl <sub>2</sub> NO                 |    | 6.9 Å × 8.6 Å   |
| Butylate        | 193 | -1.22±0.70 | 4.15 | 2008-41-5   | C <sub>11</sub> H <sub>23</sub> NOS                              |   | 7.5 Å × 9.8 Å   |
| Chlorfenvinphos | 194 |            | 3.81 | 470-90-6    | C <sub>12</sub> H <sub>14</sub> Cl <sub>3</sub> O <sub>4</sub> P |  | 7.5 Å × 10.4 Å  |

|                           |     |           |       |            |                                                                         |                                                                                       |               |
|---------------------------|-----|-----------|-------|------------|-------------------------------------------------------------------------|---------------------------------------------------------------------------------------|---------------|
| Chlorpyrifos              | 195 |           | 4.96  | 2921-88-2  | C <sub>9</sub> H <sub>11</sub> Cl <sub>3</sub> NO <sub>3</sub> PS       | 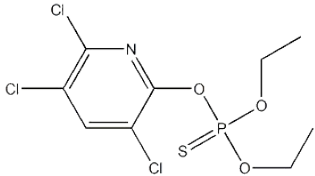   | 6.5 Å × 9.8 Å |
| Dimethenamid              | 196 | 1.16±0.50 | 2.15  | 87674-68-8 | C <sub>12</sub> H <sub>18</sub> ClNO <sub>2</sub> S                     |    | 6.4 Å × 8.7 Å |
| Flurtamone                | 197 | 2.97±0.40 | 2.87  | 96525-23-4 | C <sub>18</sub> H <sub>14</sub> F <sub>3</sub> NO <sub>2</sub>          |    | 9.5 Å × 9.8 Å |
| Formetanate Hydrochloride | 198 |           | -0.64 | 23422-53-9 | C <sub>11</sub> H <sub>15</sub> N <sub>3</sub> O <sub>2</sub> ·HCl<br>1 |  | 7.5 Å × 8.9 Å |

|               |     |            |      |             |                                                                                     |                                                                                      |                 |
|---------------|-----|------------|------|-------------|-------------------------------------------------------------------------------------|--------------------------------------------------------------------------------------|-----------------|
| Flubendiamide | 199 | 11.59±0.70 |      | 272451-65-7 | C <sub>23</sub> H <sub>22</sub> F <sub>7</sub> IN <sub>2</sub> O <sub>4</sub> S     | 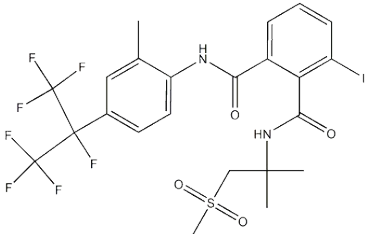  | 10.0 Å × 10.5 Å |
| Beflubutamid  | 200 | 14.66±0.46 | 4.81 | 113614-08-7 | C <sub>18</sub> H <sub>17</sub> F <sub>4</sub> NO <sub>2</sub>                      |   | 6.8 Å × 13.5 Å  |
| Fipronil      | 201 | -5.86±0.20 | 4    | 120068-37-3 | C <sub>12</sub> H <sub>4</sub> Cl <sub>2</sub> F <sub>6</sub> N <sub>4</sub> O<br>S |   | 8.4 Å × 10.7 Å  |
| Fluoxastrobin | 202 |            | 2    | 361377-29-9 | C <sub>21</sub> H <sub>16</sub> ClF <sub>4</sub> N <sub>4</sub> O <sub>5</sub>      |  | 8.8 Å × 12.6 Å  |

|                  |     |            |      |             |                                                                   |                                                                                       |                |
|------------------|-----|------------|------|-------------|-------------------------------------------------------------------|---------------------------------------------------------------------------------------|----------------|
| Fluxapyroxad     | 203 | 11.73±0.70 | 3.47 | 907204-31-3 | C <sub>18</sub> H <sub>12</sub> F <sub>5</sub> N <sub>3</sub> O   | 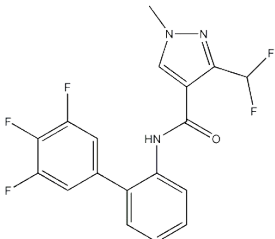   | 7.5 Å × 12.3 Å |
| Silthiofam       | 204 |            | 5.29 | 175217-20-6 | C <sub>13</sub> H <sub>21</sub> NOSSi                             |    | 6.9 Å × 10.4 Å |
| Tembotrione      | 205 | 3.17±0.50  | 3    | 335104-84-2 | C <sub>17</sub> H <sub>16</sub> ClF <sub>3</sub> O <sub>6</sub> S |    | 9.2 Å × 10.3 Å |
| Oxasulfuron      | 206 | 5.1        | 1.1  | 144651-06-9 | C <sub>17</sub> H <sub>18</sub> N <sub>4</sub> O <sub>6</sub> S   |   | 9.0 Å × 13.3 Å |
| Parathion-methyl | 207 |            | 2.86 | 298-00-0    | C <sub>8</sub> H <sub>10</sub> NO <sub>5</sub> PS                 |  | 8.1 Å × 8.6 Å  |

|                   |     |            |       |             |                                                                  |                                                                                       |                 |
|-------------------|-----|------------|-------|-------------|------------------------------------------------------------------|---------------------------------------------------------------------------------------|-----------------|
| Pirimiphos-methyl | 208 | 3.71       | 4.2   | 29232-93-7  | C <sub>11</sub> H <sub>20</sub> N <sub>3</sub> O <sub>3</sub> PS | 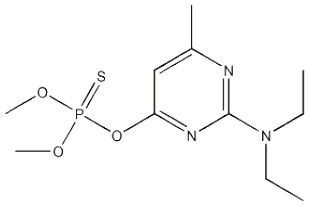   | 9.2 Å × 10.7 Å  |
| Methiocarb        | 209 | 12.16±0.46 | 2.92  | 2032-65-7   | C <sub>11</sub> H <sub>15</sub> NO <sub>2</sub> S                |    | 6.9 Å × 8.4 Å   |
| Bifenox           | 210 |            | 4.48  | 42576-02-3  | C <sub>14</sub> H <sub>9</sub> Cl <sub>2</sub> NO <sub>5</sub>   |    | 7.3 Å × 9.8 Å   |
| Foramsulfuron     | 211 | 4.6        | -0.82 | 173159-57-4 | C <sub>17</sub> H <sub>20</sub> N <sub>6</sub> O <sub>7</sub> S  |   | 12.9 Å × 14.0 Å |
| Azoxystrobin      | 212 | -0.93±0.18 | 2.5   | 131860-33-8 | C <sub>22</sub> H <sub>17</sub> N <sub>3</sub> O <sub>5</sub>    |  | 9.0 Å × 13.8 Å  |

|              |     |            |      |             |                                                                 |                                                                                       |                |
|--------------|-----|------------|------|-------------|-----------------------------------------------------------------|---------------------------------------------------------------------------------------|----------------|
| Bupirimate   | 213 | 5          | 2.7  | 41483-43-6  | C <sub>13</sub> H <sub>24</sub> N <sub>4</sub> O <sub>3</sub> S | 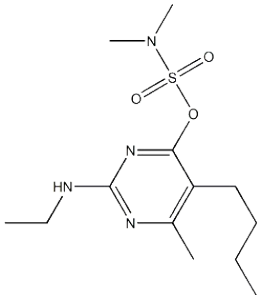   | 9.2 Å × 13.0 Å |
| Triadimefon  | 214 | 1.41±0.11  | 2.77 | 43121-43-3  | C <sub>14</sub> H <sub>16</sub> ClN <sub>3</sub> O <sub>2</sub> |    | 7.3 Å × 9.7 Å  |
| Clothianidin | 215 | 2.76±0.50  | 0.64 | 210880-92-5 | C <sub>6</sub> H <sub>8</sub> ClN <sub>5</sub> O <sub>2</sub> S |    | 6.0 Å × 9.1 Å  |
| Clomazone    | 216 | -1.48±0.40 | 2.5  | 81777-89-1  | C <sub>12</sub> H <sub>14</sub> ClNO <sub>2</sub>               |   | 6.5 Å × 9.1 Å  |
| Dodemorph    | 217 | 8.56±0.60  | 5.7  | 1593-77-7   | C <sub>18</sub> H <sub>35</sub> NO                              |  | 7.7 Å × 8.8 Å  |

|              |     |            |      |             |                                                                                |                                                                                       |                 |
|--------------|-----|------------|------|-------------|--------------------------------------------------------------------------------|---------------------------------------------------------------------------------------|-----------------|
| Desmedipham  | 218 | 12.96±0.70 | 3.39 | 13684-56-5  | C <sub>16</sub> H <sub>16</sub> N <sub>2</sub> O <sub>4</sub>                  | 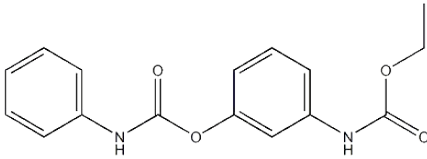   | 7.4 Å × 9.1 Å   |
| Diniconazole | 219 | 12.89±0.20 | 4.3  | 83657-24-3  | C <sub>15</sub> H <sub>17</sub> Cl <sub>2</sub> N <sub>3</sub> O               |    | 7.7 Å × 9.6 Å   |
| Imazalil     | 220 | 6.53       | 3.82 | 35554-44-0  | C <sub>14</sub> H <sub>14</sub> Cl <sub>2</sub> N <sub>2</sub> O               |    | 6.9 Å × 9.6 Å   |
| Isoxaflutole | 221 | -4.29±0.50 | 2.32 | 141112-29-0 | C <sub>15</sub> H <sub>12</sub> F <sub>3</sub> NO <sub>4</sub> S               |   | 6.8 Å × 8.0 Å   |
| Indoxacarb   | 222 | -1.75±0.40 |      | 144171-61-9 | C <sub>22</sub> H <sub>17</sub> ClF <sub>3</sub> N <sub>3</sub> O <sub>7</sub> |  | 12.2 Å × 13.6 Å |



|              |     |            |      |            |                                                                              |                                                                                       |                 |
|--------------|-----|------------|------|------------|------------------------------------------------------------------------------|---------------------------------------------------------------------------------------|-----------------|
| Methidathion | 223 | -4.17±0.40 | 2.2  | 950-37-8   | C <sub>6</sub> H <sub>11</sub> N <sub>2</sub> O <sub>4</sub> PS <sub>3</sub> | 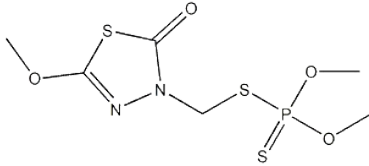   | 8.4 Å × 8.9 Å   |
| Monuron      | 224 | 14.22±0.70 | 1.94 | 150-68-5   | C <sub>9</sub> H <sub>11</sub> ClN <sub>2</sub> O                            |    | 5.0 Å × 8.0 Å   |
| Penconazole  | 225 | 2.80±0.10  | 4.67 | 66246-88-6 | C <sub>13</sub> H <sub>15</sub> Cl <sub>2</sub> N <sub>3</sub>               |    | 7.0 Å × 8.5 Å   |
| Phenmedipham | 226 | 13.03±0.70 | 3.59 | 13684-63-4 | C <sub>16</sub> H <sub>16</sub> N <sub>2</sub> O <sub>4</sub>                |   | 7.8 Å × 9.3 Å   |
| Propargite   | 227 |            | 5    | 2312-35-8  | C <sub>19</sub> H <sub>26</sub> O <sub>4</sub> S                             |  | 10.7 Å × 12.8 Å |

|               |     |                  |      |             |                         |                                                                                       |                                            |
|---------------|-----|------------------|------|-------------|-------------------------|---------------------------------------------------------------------------------------|--------------------------------------------|
| Malathion     | 228 |                  | 2.36 | 121-75-5    | $C_{10}H_{19}O_6PS_2$   | 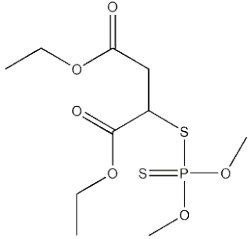   | $9.0 \text{ \AA} \times 10.5 \text{ \AA}$  |
| Triticonazole | 229 | $13.23 \pm 0.40$ | 3.29 | 131983-72-7 | $C_{17}H_{20}ClN_3O$    |    | $6.6 \text{ \AA} \times 10.6 \text{ \AA}$  |
| Thiamethoxam  | 230 | $0.99 \pm 0.10$  | 0.8  | 153719-23-4 | $C_8H_{10}ClN_5O_3S$    |    | $6.0 \text{ \AA} \times 8.8 \text{ \AA}$   |
| Thiodicarb    | 231 |                  | 1.7  | 59669-26-0  | $C_{10}H_{18}N_4O_4S_3$ |   | $10.4 \text{ \AA} \times 12.8 \text{ \AA}$ |
| Tralkoxydim   | 232 | $4.20 \pm 0.25$  | 4.46 | 87820-88-0  | $C_{20}H_{27}NO_3$      |  | $7.4 \text{ \AA} \times 14.1 \text{ \AA}$  |

|                     |     |            |      |             |                                                                                    |                                                                                       |                |
|---------------------|-----|------------|------|-------------|------------------------------------------------------------------------------------|---------------------------------------------------------------------------------------|----------------|
| Bixafen             | 233 | 10.82±0.70 | 4.36 | 581809-46-3 | C <sub>18</sub> H <sub>12</sub> Cl <sub>2</sub> F <sub>3</sub> N <sub>3</sub> O    | 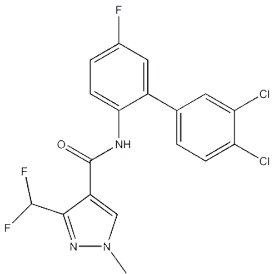   | 7.6 Å × 12.6 Å |
| Spiromesifen        | 234 |            | 6.08 | 283594-90-1 | C <sub>23</sub> H <sub>30</sub> O <sub>4</sub>                                     |    | 9.5 Å × 12.7 Å |
| Chlorantraniliprole | 235 |            | 3.98 | 500008-45-7 | C <sub>18</sub> H <sub>14</sub> BrCl <sub>2</sub> N <sub>5</sub><br>O <sub>2</sub> |    | 7.9 Å × 12.5 Å |
| Chlorthiamid        | 236 | 11.71±0.29 | 2.96 | 1918-13-4   | C <sub>7</sub> H <sub>5</sub> Cl <sub>2</sub> NS                                   |  | 5.7 Å × 6.3 Å  |
| Fuberidazole        | 237 | 4.6        | 2.67 | 3878-19-1   | C <sub>11</sub> H <sub>8</sub> N <sub>2</sub> O                                    |  | 6.7 Å × 8.2 Å  |

|               |     |            |      |             |                                                                   |                                                                                       |                |
|---------------|-----|------------|------|-------------|-------------------------------------------------------------------|---------------------------------------------------------------------------------------|----------------|
| Imazosulfuron | 238 | 4          | 1.72 | 122548-33-8 | C <sub>14</sub> H <sub>13</sub> ClN <sub>6</sub> O <sub>5</sub> S | 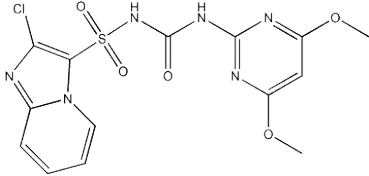   | 9.1 Å × 12.9 Å |
| Triasulfuron  | 239 |            | 2.44 | 82097-50-5  | C <sub>14</sub> H <sub>16</sub> ClN <sub>5</sub> O <sub>5</sub> S |    | 9.1 Å × 10.6 Å |
| Dimoxystrobin | 240 | 11.29±0.46 | 5.36 | 149961-52-4 | C <sub>19</sub> H <sub>22</sub> N <sub>2</sub> O <sub>3</sub>     |    | 8.0 Å × 10.0 Å |
| Cyromazine    | 241 | 5.2        | 0.96 | 66215-27-8  | C <sub>6</sub> H <sub>10</sub> N <sub>6</sub>                     |  | 6.1 Å × 8.1 Å  |

|                      |     |                  |      |             |                          |                                                                                       |                                           |
|----------------------|-----|------------------|------|-------------|--------------------------|---------------------------------------------------------------------------------------|-------------------------------------------|
| Fluopicolide         | 242 |                  | 4.62 | 239110-15-7 | $C_{14}H_8Cl_3F_3N_2O$   | 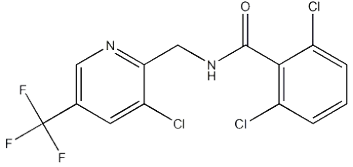   | $7.2 \text{ \AA} \times 13.0 \text{ \AA}$ |
| Triforine            | 243 | 10.6             | 2.2  | 26644-46-2  | $C_{10}H_{14}Cl_6N_4O_2$ |    | $8.3 \text{ \AA} \times 10.9 \text{ \AA}$ |
| Clodinafop-propargyl | 244 | $-1.54 \pm 0.32$ | 3.9  | 105512-06-9 | $C_{17}H_{13}ClFNO_4$    |    | $9.3 \text{ \AA} \times 12.8 \text{ \AA}$ |
| Prosulfuron          | 245 | $4.30 \pm 0.10$  | 3.56 | 94125-34-5  | $C_{15}H_{16}F_3N_5O_4S$ |   | $7.0 \text{ \AA} \times 14.6 \text{ \AA}$ |
| Fenitrothion         | 246 |                  | 3.3  | 122-14-5    | $C_9H_{12}NO_3PS$        |  | $8.1 \text{ \AA} \times 8.9 \text{ \AA}$  |

|              |     |           |       |             |                                                                  |                                                                                      |                 |
|--------------|-----|-----------|-------|-------------|------------------------------------------------------------------|--------------------------------------------------------------------------------------|-----------------|
| Oxamyl       | 247 |           | -0.47 | 23135-22-0  | C <sub>7</sub> H <sub>13</sub> N <sub>3</sub> O <sub>3</sub> S   | 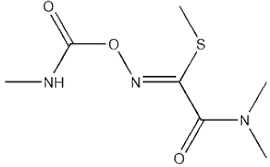  | 7.4 Å × 8.9 Å   |
| Azimsulfuron | 248 | 3.6       | 0.65  | 120162-55-2 | C <sub>13</sub> H <sub>16</sub> N <sub>10</sub> O <sub>5</sub> S |   | 10.7 Å × 12.7 Å |
| Aldicarb     | 249 |           | 1.13  | 116-06-3    | C <sub>7</sub> H <sub>14</sub> N <sub>2</sub> O <sub>2</sub> S   |   | 6.3 Å × 9.1 Å   |
| Simazine     | 250 | 2.71±0.10 | 2.18  | 122-34-9    | C <sub>7</sub> H <sub>12</sub> ClN <sub>5</sub>                  |  | 7.1 Å × 9.5 Å   |

|                       |     |            |      |             |                                                                              |                                                                                       |                |
|-----------------------|-----|------------|------|-------------|------------------------------------------------------------------------------|---------------------------------------------------------------------------------------|----------------|
| Pethoxamid            | 251 | -2.36±0.70 | 3.39 | 106700-29-2 | C <sub>16</sub> H <sub>22</sub> ClNO <sub>2</sub>                            | 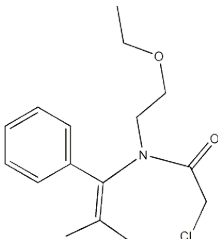   | 8.3 Å × 8.8 Å  |
| Phoxim                | 252 |            | 4.39 | 14816-18-3  | C <sub>12</sub> H <sub>15</sub> N <sub>2</sub> O <sub>3</sub> PS             |    | 8.1 Å × 9.9 Å  |
| Metconazole           | 253 | 13.82±0.60 | 3.93 | 125116-23-6 | C <sub>17</sub> H <sub>22</sub> ClN <sub>3</sub> O                           |    | 6.9 Å × 10.2 Å |
| Flurprimidol          | 254 | 12.23±0.29 | 3.34 | 56425-91-3  | C <sub>15</sub> H <sub>15</sub> F <sub>3</sub> N <sub>2</sub> O <sub>2</sub> |   | 7.7 Å × 9.5 Å  |
| Indole-3-butyric acid | 255 | 4.83±0.10  | 2.3  | 133-32-4    | C <sub>12</sub> H <sub>13</sub> NO <sub>2</sub>                              |  | 8.3 Å × 9.4 Å  |

|                           |     |            |      |            |                                                 |                                                                                                        |                |
|---------------------------|-----|------------|------|------------|-------------------------------------------------|--------------------------------------------------------------------------------------------------------|----------------|
| EthylIndole-3-carboxylate | 256 | 15.42±0.30 | 3.04 | 776-41-0   | C <sub>11</sub> H <sub>11</sub> NO <sub>2</sub> | 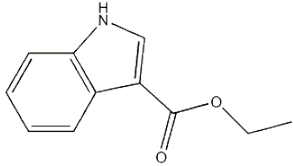                    | 5.4 Å × 10.3 Å |
| 3-Indolylacetic acid      | 257 | 4.75       | 1.41 | 87-51-4    | C <sub>10</sub> H <sub>9</sub> NO <sub>2</sub>  |                     | 5.7 Å × 7.7 Å  |
| Mepiquat chloride         | 258 |            |      | 24307-26-4 | C <sub>7</sub> H <sub>16</sub> ClN              | <br>Cl <sup>-</sup> | 4.1 Å × 7.6 Å  |



**Table S6** Limits of quantification ( $\mu\text{g}/\text{kg}$ ), estimation of matrix effect for spinach, average recovery ratio (R,%) and relative standard deviation (RSD, n=5, %) at two different pesticides levels (10  $\mu\text{g}/\text{kg}$  and 100  $\mu\text{g}/\text{kg}$ )

| Analytes                                      | Serial number | LOQ | ME   | 10ppb          | 100ppb         | Analytes     | Serial number | LOQ | ME   | 10ppb           | 100ppb         |
|-----------------------------------------------|---------------|-----|------|----------------|----------------|--------------|---------------|-----|------|-----------------|----------------|
|                                               |               |     |      | R (RSD)        | R(RSD)         |              |               |     |      | R (RSD)         | R(RSD)         |
| 3-Hydroxy-carbofuran                          | 1             | 10  | 0.97 | 108.6<br>(3.4) | 113.7<br>(2.3) | Ethofenprox  | 25            | 10  | 0.75 | 68.6<br>(9.5)   | 63.3<br>(11.8) |
| 4-Bromo-3,5-dimethylphenyl-N-methyl-carbamate | 2             | 10  | 0.55 | 115.7<br>(2.9) | 106.3<br>(4.5) | Promecarb    | 26            | 10  | 0.57 | 109.3<br>(11.5) | 105.0<br>(9.4) |
| Fenpropidin                                   | 3             | 10  | 0.87 | 99.7<br>(3.4)  | 94.5<br>(3.4)  | Benodanil    | 27            | 10  | 0.92 | 94.1<br>(5.3)   | 92.8<br>(3.4)  |
| Fenoxycarb                                    | 4             | 10  | 1.03 | 110.7<br>(8.2) | 107.4<br>(9.1) | Mecarbam     | 28            | 10  | 0.35 | 94.4<br>(9.7)   | 102.0<br>(2.7) |
| Dichlofenthion                                | 5             | 10  | 0.87 | 106.8<br>(4.1) | 102.3<br>(0.7) | Diphenamid   | 29            | 10  | 0.85 | 104.6<br>(3.0)  | 95.0<br>(3.8)  |
| Trichlorfon                                   | 6             | 10  | 0.98 | 100.4<br>(1.5) | 95.8<br>(1.0)  | Triflumuron  | 30            | 10  | 0.99 | 67.5<br>(2.0)   | 68.0<br>(1.7)  |
| Propachlor                                    | 7             | 10  | 0.92 | 119.5<br>(1.0) | 113.1<br>(9.0) | Tricyclazole | 31            | 10  | 2.05 | 78.0<br>(1.9)   | 78.3<br>(3.2)  |
| Dioxathion                                    | 8             | 10  | 1.01 | 97.3<br>(0.3)  | 102.1<br>(1.6) | Propamocarb  | 32            | 10  | 0.93 | 104.9<br>(2.3)  | 100.6<br>(1.0) |
| Tebuthiuron                                   | 9             | 10  | 2.95 | 107.5<br>(4.2) | 96.9<br>(3.5)  | Cymoxanil    | 33            | 10  | 2.83 | 72.0<br>(5.0)   | 86.6<br>(7.6)  |
| Lontrel                                       | 10            | 10  | 1.74 | 105.2<br>(4.4) | 107.3<br>(3.4) | Etoxazole    | 34            | 10  | 0.78 | 102.9<br>(3.0)  | 95.8<br>(0.7)  |

|               |    |    |      |                 |                 |                       |    |    |      |                |                 |
|---------------|----|----|------|-----------------|-----------------|-----------------------|----|----|------|----------------|-----------------|
| Dinotefuran   | 11 | 10 | 0.21 | 119.9<br>(3.9)  | 118.9<br>(5.3)  | Altrenogest           | 35 | 10 | 0.99 | 111.0<br>(2.7) | 103.9<br>(3.5)  |
| Furanthiocarb | 12 | 10 | 0.61 | 100.3<br>(12.5) | 111.7<br>(12.3) | Tolfenamic<br>acid    | 36 | 10 | 1.02 | 60.5<br>(3.1)  | 72.7<br>(3.2)   |
| Bioallethrin  | 13 | 10 | 0.82 | 109.0<br>(11.5) | 101.1<br>(8.9)  | Aldicarb-<br>sulfone  | 37 | 10 | 0.52 | 108.5<br>(4.2) | 90.8<br>(8.2)   |
| Asulam        | 14 | 10 | 0.95 | 108.6<br>(6.5)  | 113.8<br>(5.1)  | Aldicarb<br>sulfoxide | 38 | 10 | 0.4  | 97.8<br>(16.4) | 99.2<br>(5.6)   |
| Griseofulvin  | 15 | 10 | 0.78 | 92.1<br>(1.7)   | 95.4<br>(3.5)   | DEF 6                 | 39 | 10 | 0.77 | 101.2<br>(0.9) | 99.9<br>(1.0)   |
| Sulfosulfuron | 16 | 10 | 0.85 | 86.6<br>(0.7)   | 83.8<br>(1.5)   | Carboxin              | 40 | 10 | 0.86 | 108.1<br>(2.6) | 100.1<br>(1.2)  |
| Benoxacor     | 17 | 10 | 0.97 | 97.2<br>(3.7)   | 95.9<br>(2.4)   | Methoprene            | 41 | 10 | 0.91 | 100.5<br>(3.6) | 106.8<br>(7.2)  |
| Bromuconazol  | 18 | 10 | 1.12 | 103.9<br>(0.9)  | 101.1<br>(1.1)  | EPTC                  | 42 | 10 | 0.92 | 100.9<br>(3.7) | 115.9<br>(8.3)  |
| Butafenacil   | 19 | 10 | 0.31 | 114.9<br>(2.5)  | 107.5<br>(2.3)  | Ethiofencarb          | 43 | 10 | 0.59 | 94.5<br>(7.6)  | 110.5<br>(14.3) |
| Thiodicarb    | 20 | 10 | 0.37 | 87.8<br>(15.8)  | 99.9<br>(11.5)  | Ethion                | 44 | 10 | 0.38 | 104.7<br>(5.7) | 107.8<br>(9.3)  |
| Mesurol       | 21 | 10 | 0.69 | 91.0<br>(6.3)   | 84.1<br>(11.5)  | Diethofencarb         | 45 | 10 | 0.89 | 103.1<br>(2.0) | 112.1<br>(4.5)  |
| Flazasulfuron | 22 | 10 | 0.68 | 83.9<br>(3.2)   | 88.2<br>(3.6)   | Triallate             | 46 | 10 | 0.56 | 87.2<br>(13.7) | 95.0<br>(15.9)  |
| Methomyl      | 23 | 10 | 0.64 | 95.8<br>(6.2)   | 110.3<br>(9.0)  | Mandestrobin          | 47 | 10 | 1.05 | 91.0<br>(3.4)  | 92.7<br>(2.7)   |

|                  |    |    |      |                |                |               |    |    |      |                 |                 |
|------------------|----|----|------|----------------|----------------|---------------|----|----|------|-----------------|-----------------|
| Aminocarb        | 24 | 10 | 1.11 | 112.7<br>(1.8) | 109.1<br>(2.1) | Valifenalate  | 48 | 10 | 0.87 | 103.2<br>(1.0)  | 109.0<br>(0.6)  |
| Chlormequat      | 49 | 10 | 0.59 | 103.2<br>(4.1) | 114.7<br>(1.6) | Diazinon      | 81 | 10 | 1.57 | 101.5<br>(1.1)  | 107.6<br>(2.1)  |
| Fenpyrazamine    | 50 | 10 | 1.08 | 103.1<br>(0.7) | 109.7<br>(0.6) | Flutriafol    | 82 | 10 | 0.18 | 108.8<br>(2.5)  | 100.3<br>(10.8) |
| Fenthion         | 51 | 10 | 1.02 | 95.4<br>(5.8)  | 97.8<br>(3.2)  | Rimsulfuron   | 83 | 10 | 0.32 | 73.8<br>(10.8)  | 73.2<br>(7.6)   |
| Aclonifen        | 52 | 10 | 1.20 | 64.2<br>(6.6)  | 65.9<br>(7.1)  | Phosalone     | 84 | 10 | 1.04 | 69.7<br>(0.7)   | 72.0<br>(2.5)   |
| Difenoconazole   | 53 | 10 | 1.96 | 99.6<br>(2.9)  | 95.5<br>(3.6)  | Fluvalinate   | 85 | 10 | 0.74 | 95.2<br>(5.0)   | 94.2<br>(2.5)   |
| Phenothrin       | 54 | 10 | 1.03 | 93.6<br>(8.9)  | 97.7<br>(6.7)  | Fluopyram     | 86 | 10 | 0.89 | 101.8<br>(0.93) | 107.7<br>(0.4)  |
| Saflufenacil     | 55 | 10 | 0.47 | 105.3<br>(2.5) | 110.4<br>(0.8) | Fluazinam     | 87 | 10 | 1.46 | 97.3<br>(9.9)   | 97.8<br>(2.3)   |
| Zoxamide         | 56 | 10 | 1.12 | 105.1<br>(6.0) | 106.4<br>(3.3) | Sulfoxaflor   | 88 | 10 | 1.16 | 109.5<br>(2.6)  | 106.9<br>(3.6)  |
| Fenamiphos       | 57 | 10 | 1.25 | 95.7<br>(2.7)  | 97.0<br>(3.3)  | Flonicamid    | 89 | 10 | 0.64 | 99.3<br>(4.1)   | 107.5<br>(1.5)  |
| Pyraflufen Ethyl | 58 | 10 | 1.00 | 99.3<br>(6.9)  | 106.4<br>(2.8) | Flusilazole   | 90 | 10 | 1.18 | 100.0<br>(5.1)  | 105.7<br>(3.1)  |
| Pyriproxyfen     | 59 | 10 | 1.35 | 69.0<br>(1.1)  | 80.4<br>(1.7)  | Epoxiconazole | 91 | 10 | 1.18 | 87.8<br>(3.1)   | 91.5<br>(2.3)   |
| Haloxyfop        | 60 | 10 | 1.13 | 105.4<br>(3.5) | 100.1<br>(3.4) | Tetraconazole | 92 | 10 | 0.98 | 99.3<br>(2.3)   | 108.2<br>(1.9)  |

|                             |    |    |      |                |                |                    |     |    |      |                |                 |
|-----------------------------|----|----|------|----------------|----------------|--------------------|-----|----|------|----------------|-----------------|
| Isopyrazam                  | 61 | 10 | 1.07 | 99.9<br>(0.8)  | 101.2<br>(1.6) | Flucythrinate      | 93  | 10 | 1.03 | 75.3<br>(9.5)  | 104.7<br>(11.7) |
| Resmethrin                  | 62 | 10 | 0.94 | 102.0<br>(2.7) | 100.1<br>(0.7) | Flufenacet         | 94  | 10 | 1.16 | 100.7<br>(7.8) | 101.3<br>(2.5)  |
| Propoxycarbazone-<br>sodium | 63 | 10 | 0.67 | 93.3<br>(3.2)  | 105.1<br>(2.8) | Flutolanil         | 95  | 10 | 1.96 | 107.2<br>(8.4) | 110.5<br>(4.9)  |
| Propiconazole               | 64 | 10 | 1.15 | 97.8<br>(1.9)  | 103.9<br>(3.7) | Procymidone        | 96  | 10 | 1.39 | 109.5<br>(5.3) | 101.8<br>(3.4)  |
| Prothioconazole             | 65 | 10 | 1.10 | 98.3<br>(1.7)  | 105.5<br>(1.8) | Thiobencarb        | 97  | 10 | 1.26 | 104.7<br>(6.6) | 101.7<br>(7.4)  |
| Oxadiargyl                  | 66 | 10 | 1.10 | 100.0<br>(1.6) | 106.8<br>(1.4) | Molinate           | 98  | 10 | 1.58 | 109.6<br>(5.9) | 107.4<br>(6.6)  |
| Flumioxazin                 | 67 | 10 | 0.28 | 100.7<br>(1.5) | 107.6<br>(5.1) | Cyproconazole      | 99  | 10 | 1.26 | 98.6<br>(2.1)  | 110.8<br>(3.8)  |
| Iprovalicarb                | 68 | 10 | 1.98 | 95.3<br>(8.7)  | 99.5<br>(10.8) | Chromafenozi<br>de | 100 | 10 | 0.94 | 102.0<br>(1.9) | 107.8<br>(1.7)  |
| Methacrifos                 | 69 | 10 | 2.83 | 104.2<br>(5.9) | 102.4<br>(7.7) | Cyflufenamide      | 101 | 10 | 0.96 | 101.2<br>(1.5) | 109.4<br>(2.5)  |
| Isoprothiolane              | 70 | 10 | 0.75 | 103.3<br>(2.9) | 109.0<br>(2.6) | Sulcotrione        | 102 | 10 | 0.32 | 99.5<br>(11.6) | 103.0<br>(9.2)  |
| Tepraloxydim                | 71 | 10 | 0.18 | 87.5<br>(3.9)  | 90.1<br>(6.5)  | Metosulam          | 103 | 10 | 0.23 | 93.7<br>(1.6)  | 90.0<br>(4.8)   |
| Diuron                      | 72 | 10 | 1.35 | 84.3<br>(4.9)  | 87.4<br>(9.9)  | Tolyfluanide       | 104 | 10 | 1.09 | 108.4<br>(7.0) | 108.5<br>(3.8)  |
| Anilazine                   | 73 | 10 | 1.01 | 54.7<br>(2.2)  | 58.8<br>(3.6)  | Alachlor           | 105 | 10 | 1.33 | 68.5<br>(5.7)  | 103.5<br>(5.6)  |

|                        |     |    |      |                 |                |                         |     |    |      |                |                 |
|------------------------|-----|----|------|-----------------|----------------|-------------------------|-----|----|------|----------------|-----------------|
| Iodosulfuron-methyl    | 74  | 10 | 1.07 | 64.5<br>(3.7)   | 63.3<br>(3.1)  | Metsulfuron<br>methyl   | 106 | 10 | 0.28 | 87.0<br>(2.3)  | 88.1<br>(3.5)   |
| Daminozide             | 75  | 10 | 0.70 | 105.7<br>(7.3)  | 99.5<br>(6.1)  | Mesosulfuron-<br>methyl | 107 | 10 | 0.13 | 66.1<br>(10.7) | 74.1<br>(15.2)  |
| Acetamiprid            | 76  | 10 | 1.13 | 102.1<br>(6.7)  | 105.1<br>(4.8) | Tolclofos-<br>methyl    | 108 | 10 | 1.10 | 96.6<br>(3.1)  | 94.3<br>(4.9)   |
| Picoxystrobin          | 77  | 10 | 1.11 | 104.7<br>(2.6)  | 110.0<br>(2.2) | Thiophanate-<br>methyl  | 109 | 10 | 0.34 | 86.6<br>(4.4)  | 93.0<br>(1.8)   |
| Carbendazim            | 78  | 10 | 0.87 | 35.5<br>(1.6)   | 72.0<br>(2.3)  | Carbaryl                | 110 | 10 | 0.23 | 73.3<br>(14.6) | 80.0<br>(3.6)   |
| Sandofan               | 79  | 10 | 1.71 | 98.2<br>(3.1)   | 113.4<br>(2.6) | Metalaxyl               | 111 | 10 | 0.27 | 113.6<br>(3.0) | 101.9<br>(12.7) |
| Diphenylamine          | 80  | 10 | 1.67 | 68.7<br>(1.3)   | 91.3<br>(0.8)  | Metazachlor             | 112 | 10 | 0.10 | 112.6<br>(5.3) | 100.2<br>(6.6)  |
| Tebufenozide           | 113 | 10 | 0.92 | 102.8<br>(12.8) | 108.1<br>(1.5) | Tridemorph              | 145 | 10 | 1.20 | 95.2<br>(8.3)  | 100.1<br>(3.0)  |
| Famoxadone             | 114 | 10 | 1.11 | 104.0<br>(4.9)  | 103.0<br>(1.9) | Bromophos-<br>ethyl     | 146 | 10 | 1.05 | 68.0<br>(3.4)  | 73.0<br>(0.3)   |
| Emamectin              | 115 | 10 | 0.97 | 74.0<br>(4.0)   | 83.4<br>(1.7)  | Chloroxuron             | 147 | 10 | 1.25 | 93.7<br>(4.5)  | 95.7<br>(1.2)   |
| cis and trans-Diallate | 116 | 10 | 0.84 | 87.6<br>(15.9)  | 119.2<br>(7.3) | Bromopropyla<br>te      | 148 | 10 | 1.15 | 98.8<br>(2.5)  | 100.2<br>(3.3)  |
| Chloridazon            | 117 | 10 | 0.56 | 100.0<br>(3.0)  | 103.1<br>(2.0) | Nicosulfuron            | 149 | 10 | 0.45 | 64.2<br>(4.1)  | 74.1<br>(2.1)   |
| Pendimethaline         | 118 | 10 | 1.1  | 78.1<br>(2.6)   | 90.7<br>(3.1)  | Fenpyroximate           | 150 | 10 | 1.24 | 68.1<br>(4.3)  | 67.7<br>(2.6)   |

|                   |     |    |      |                 |                |                  |     |    |      |                |                |
|-------------------|-----|----|------|-----------------|----------------|------------------|-----|----|------|----------------|----------------|
| Trinexapac-ethyl  | 119 | 10 | 0.34 | 104.0<br>(5.1)  | 102.9<br>(3.2) | Acequinocyl      | 151 | 10 | 1.30 | 65.8<br>(4.1)  | 79.3<br>(3.3)  |
| Spirotetramat     | 120 | 10 | 1.15 | 106.8<br>(5.4)  | 111.9<br>(2.1) | Bifenazate       | 152 | 10 | 0.97 | 63.9<br>(3.0)  | 64.9<br>(1.5)  |
| Cadusafos         | 121 | 10 | 0.9  | 102.3<br>(7.3)  | 104.5<br>(0.1) | Trifloxystrobin  | 153 | 10 | 1.20 | 104.7<br>(3.7) | 107.3<br>(0.5) |
| Quinalphos        | 122 | 10 | 1.27 | 84.0<br>(5.2)   | 82.6<br>(2.5)  | Cyantraniliprole | 154 | 10 | 0.20 | 60.9<br>(3.3)  | 65.3<br>(3.3)  |
| Orthosulfamuron   | 123 | 10 | 0.62 | 53.7<br>(3.4)   | 62.8<br>(3.6)  | Phosmet          | 155 | 10 | 1.43 | 102.9<br>(4.5) | 103.4<br>(0.7) |
| Cyhalofop-butyl   | 124 | 10 | 1.07 | 97.9<br>(10.0)  | 99.1<br>(2.8)  | Bitertanol       | 156 | 10 | 1.22 | 101.4<br>(2.6) | 101.1<br>(2.7) |
| Cyazofamid        | 125 | 10 | 1.38 | 105.0<br>(7.1)  | 100.3<br>(2.6) | Triadimenol      | 157 | 10 | 1.34 | 98.6<br>(5.7)  | 103.5<br>(0.9) |
| Lactofen          | 126 | 10 | 1.26 | 98.9<br>(4.1)   | 110.9<br>(1.3) | Maleic hydrazide | 158 | 10 | 2.32 | 66.3<br>(4.7)  | 89.7<br>(4.4)  |
| Florasulam        | 127 | 10 | 1.14 | 94.2<br>(2.3)   | 101.0<br>(1.4) | Metolachlor      | 159 | 10 | 1.28 | 106.6<br>(5.0) | 104.8<br>(1.7) |
| Mandipropamid     | 128 | 10 | 1.18 | 101.4<br>(5.2)  | 101.7<br>(1.3) | Triclopyr        | 160 | 10 | 0.27 | 102.5<br>(9.2) | 109.3<br>(2.9) |
| Mesotrione        | 129 | 10 | 1.02 | 101.8<br>(4.8)  | 92.0<br>(2.7)  | Fenamidone       | 161 | 10 | 0.96 | 106.7<br>(5.7) | 105.3<br>(1.4) |
| Oxydemeton-methyl | 130 | 10 | 1.1  | 95.7<br>(9.9)   | 104.6<br>(3.0) | Novaluron        | 162 | 10 | 1.22 | 75.4<br>(4.0)  | 80.3<br>(2.4)  |
| Oxycarboxin       | 131 | 10 | 1.38 | 103.8<br>(12.9) | 107.9<br>(1.7) | Monolinuron      | 163 | 10 | 2.58 | 81.2<br>(10.8) | 97.2<br>(3.9)  |

|               |     |    |      |                 |                |                     |     |    |      |                 |                |
|---------------|-----|----|------|-----------------|----------------|---------------------|-----|----|------|-----------------|----------------|
| Spinetoram L  | 132 | 10 | 1.21 | 91.1<br>(5.3)   | 86.7<br>(0.8)  | Carbofuran          | 164 | 10 | 1.96 | 111.2<br>(10.5) | 92.6<br>(2.2)  |
| Ethirimol     | 133 | 10 | 0.45 | 72.1<br>(7.2)   | 74.1<br>(2.7)  | Tefluthrin          | 165 | 10 | 1.25 | 103.7<br>(2.7)  | 101.0<br>(3.7) |
| Ethoxyquin    | 134 | 10 | 2.44 | 98.0<br>(1.2)   | 108.8<br>(3.8) | Buprofezin          | 166 | 10 | 1.22 | 105.5<br>(5.3)  | 102.3<br>(0.7) |
| Propisochlor  | 135 | 10 | 0.98 | 104.0<br>(14.7) | 102.1<br>(0.8) | Dimethomorp<br>h    | 167 | 10 | 1.00 | 107.5<br>(5.2)  | 101.4<br>(0.5) |
| Isoproturon   | 136 | 10 | 0.41 | 102.2<br>(6.5)  | 101.7<br>(3.9) | Warfarin            | 168 | 10 | 1.60 | 105.2<br>(4.2)  | 104.5<br>(0.8) |
| Butralin      | 137 | 10 | 1.41 | 104.7<br>(4.4)  | 105.7<br>(1.6) | Metribuzin          | 169 | 10 | 9.26 | 96.6<br>(3.6)   | 105.3<br>(1.4) |
| Azocyclotin   | 138 | 10 | 0.76 | 87.2<br>(12.6)  | 86.6<br>(1.7)  | Pirimicarb          | 170 | 10 | 0.89 | 97.8<br>(1.4)   | 94.7<br>(2.1)  |
| Amidosulfuron | 139 | 10 | 0.1  | 67.1<br>(8.5)   | 75.4<br>(4.7)  | Fenbuconazole       | 171 | 10 | 1.28 | 94.2<br>(4.9)   | 92.0<br>(0.5)  |
| Fentin        | 140 | 10 | 1.22 | 91.5<br>(3.9)   | 101.8<br>(0.3) | Chlorotoluron       | 172 | 10 | 0.22 | 90.9<br>(4.7)   | 87.6<br>(4.9)  |
| Ametoctradin  | 141 | 10 | 1.02 | 58.6<br>(5.6)   | 52.1<br>(2.9)  | Acetochlor          | 173 | 10 | 1.27 | 101.4<br>(4.3)  | 104.3<br>(2.1) |
| Atrazine      | 142 | 10 | 0.40 | 97.7<br>(2.7)   | 97.8<br>(6.8)  | Methoxyfeno<br>zide | 174 | 10 | 1.19 | 98.2<br>(4.2)   | 104.6<br>(0.8) |
| Vinclozolin   | 143 | 10 | 0.47 | 70.4<br>(3.2)   | 115.6<br>(2.0) | Amitraz             | 175 | 10 | 1.09 | 90.6<br>(4.1)   | 110.5<br>(6.0) |
| Barban        | 144 | 10 | 1.16 | 93.1<br>(3.5)   | 102.7<br>(3.7) | Acephate            | 176 | 10 | 1.21 | 86.7<br>(4.2)   | 99.6<br>(6.0)  |

|                              |     |    |      |                |                |               |     |    |      |                |                |
|------------------------------|-----|----|------|----------------|----------------|---------------|-----|----|------|----------------|----------------|
| Flupyradifurone              | 177 | 10 | 0.78 | 89.1<br>(6.1)  | 112.8<br>(2.3) | Methiocarb    | 209 | 10 | 2.85 | 81.4<br>(2.4)  | 109.0<br>(3.7) |
| Pyrasulfotole                | 178 | 10 | 0.95 | 88.8<br>(1.0)  | 101.2<br>(0.5) | Bifenox       | 210 | 10 | 1.23 | 106.6<br>(4.3) | 106.8<br>(3.2) |
| Abamectin                    | 179 | 10 | 1.07 | 67.2<br>(8.1)  | 71.7<br>(3.4)  | Foramsulfuron | 211 | 10 | 0.19 | 64.6<br>(4.6)  | 83.2<br>(4.0)  |
| Oryzalin                     | 180 | 10 | 1.24 | 95.6<br>(4.1)  | 107.9<br>(0.6) | Azoxystrobin  | 212 | 10 | 0.53 | 95.3<br>(1.5)  | 108.6<br>(2.5) |
| Benzovindiflupyr             | 181 | 10 | 1.28 | 88.8<br>(5.2)  | 97.8<br>(1.8)  | Bupirimate    | 213 | 10 | 0.86 | 88.6<br>(1.8)  | 97.2<br>(1.1)  |
| Metrafenone                  | 182 | 10 | 1.36 | 76.7<br>(1.1)  | 91.7<br>(0.7)  | Triadimefon   | 214 | 10 | 1.16 | 98.7<br>(2.3)  | 109.8<br>(0.4) |
| Benthiavalicarb<br>isopropyl | 183 | 10 | 1.48 | 90.3<br>(3.6)  | 106.0<br>(1.2) | Clothianidin  | 215 | 10 | 1.03 | 99.8<br>(6.5)  | 110.4<br>(3.5) |
| Benzalkonium chloride        | 184 | 10 | 1.64 | 77.6<br>(0.3)  | 80.0<br>(0.9)  | Clomazone     | 216 | 10 | 1.62 | 94.8<br>(4.2)  | 108.3<br>(1.4) |
| Imidacloprid                 | 185 | 10 | 1.27 | 96.7<br>(2.0)  | 106.6<br>(4.8) | Dodemorph     | 217 | 10 | 0.49 | 82.8<br>(2.4)  | 99.6<br>(2.8)  |
| Tebufenpyrad                 | 186 | 10 | 1.50 | 89.4<br>(0.8)  | 101.1<br>(1.3) | Desmedipham   | 218 | 10 | 1.01 | 69.9<br>(2.8)  | 74.0<br>(3.4)  |
| Penthiopyrad                 | 187 | 10 | 1.45 | 93.5<br>(2.5)  | 112.6<br>(1.1) | Diniconazole  | 219 | 10 | 1.41 | 70.1<br>(1.8)  | 82.0<br>(1.3)  |
| Prosulfocarb                 | 188 | 10 | 1.43 | 101.6<br>(7.1) | 104.8<br>(3.1) | Imazalil      | 220 | 10 | 0.54 | 84.2<br>(3.6)  | 102.5<br>(3.1) |
| Profenofos                   | 189 | 10 | 1.34 | 84.9<br>(1.3)  | 95.9<br>(2.6)  | Isoxaflutole  | 221 | 10 | 0.48 | 101.1<br>(8.8) | 118.0<br>(4.7) |



|                              |     |    |      |                |                |                  |     |    |      |                 |                |
|------------------------------|-----|----|------|----------------|----------------|------------------|-----|----|------|-----------------|----------------|
| Cycloxydim                   | 190 | 10 | 1.28 | 88.7<br>(9.2)  | 81.1<br>(1.4)  | Indoxacarb       | 222 | 10 | 1.27 | 103.9<br>(3.7)  | 105.6<br>(3.7) |
| Pyridaben                    | 191 | 10 | 1.48 | 92.3<br>(2.0)  | 101.0<br>(2.0) | Methidathion     | 223 | 10 | 0.38 | 106.8<br>(1.0)  | 104.7<br>(1.6) |
| Propanil                     | 192 | 10 | 2.49 | 74.2<br>(1.7)  | 93.3<br>(2.9)  | Monuron          | 224 | 10 | 2.07 | 83.4<br>(1.4)   | 100.7<br>(1.4) |
| Butylate                     | 193 | 10 | 0.85 | 103.3<br>(8.1) | 107.8<br>(7.9) | Penconazole      | 225 | 10 | 1.41 | 99.4<br>(9.8)   | 117.1<br>(4.5) |
| Chlorfenvinphos              | 194 | 10 | 1.51 | 92.6<br>(5.0)  | 109.0<br>(1.1) | Phenmedipha<br>m | 226 | 10 | 1.73 | 56.0<br>(2.9)   | 79.4<br>(2.8)  |
| Chlorpyrifos                 | 195 | 10 | 1.35 | 90.1<br>(1.4)  | 85.0<br>(1.8)  | Propargite       | 227 | 10 | 0.93 | 93.3<br>(3.7)   | 109.2<br>(1.5) |
| Dimethenamid                 | 196 | 10 | 1.68 | 100.4<br>(3.8) | 109.6<br>(2.4) | Malathion        | 228 | 10 | 1.66 | 98.7<br>(7.8)   | 113.1<br>(5.6) |
| Flurtamone                   | 197 | 10 | 1.00 | 91.3<br>(2.0)  | 108.3<br>(1.4) | Triticonazole    | 229 | 10 | 1.78 | 89.2<br>(0.6)   | 106.0<br>(2.7) |
| Formetanate<br>Hydrochloride | 198 | 10 | 1.09 | 91.6<br>(4.0)  | 111.7<br>(1.5) | Thiamethoxam     | 230 | 10 | 1.65 | 106.4<br>(8.2)  | 113.7<br>(2.0) |
| Flubendiamide                | 199 | 10 | 1.48 | 97.4<br>(5.4)  | 102.9<br>(4.7) | Thiacloprid      | 231 | 10 | 1.04 | 92.0<br>(5.1)   | 110.8<br>(5.5) |
| Beflubutamid                 | 200 | 10 | 1.47 | 97.4<br>(0.8)  | 111.0<br>(1.0) | Tralkoxydim      | 232 | 10 | 1.56 | 84.9<br>(0.9)   | 96.7<br>(2.9)  |
| Fipronil                     | 201 | 10 | 1.40 | 90.5<br>(4.4)  | 101.9<br>(3.5) | Bixafen          | 233 | 10 | 1.84 | 67.4<br>(3.0)   | 87.5<br>(1.5)  |
| Fluoxastrobin                | 202 | 10 | 1.26 | 96.6<br>(0.5)  | 109.2<br>(0.5) | Spiromesifen     | 234 | 10 | 0.97 | 106.6<br>(13.1) | 119.6<br>(0.9) |

|                      |     |    |      |                |                |                               |     |    |      |                 |                |
|----------------------|-----|----|------|----------------|----------------|-------------------------------|-----|----|------|-----------------|----------------|
| Fluxapyroxad         | 203 | 10 | 1.12 | 84.0<br>(3.1)  | 100.0<br>(1.0) | Chlorantranili<br>prole       | 235 | 10 | 1.24 | 69.4<br>(9.4)   | 72.1<br>(10.5) |
| Silthiofam           | 204 | 10 | 1.49 | 70.5<br>(6.9)  | 118.2<br>(8.2) | Chlorthiamid                  | 236 | 10 | 0.35 | 111.7<br>(3.7)  | 98.9<br>(1.1)  |
| Tembotrione          | 205 | 10 | 1.06 | 72.9<br>(4.5)  | 101.7<br>(6.2) | Fuberidazole                  | 237 | 10 | 1.51 | 43.1<br>(0.8)   | 66.0<br>(3.0)  |
| Oxasulfuron          | 206 | 10 | 0.87 | 67.3<br>(5.2)  | 78.0<br>(1.8)  | Imazosulfuron                 | 238 | 10 | 1.09 | 52.2<br>(2.3)   | 63.8<br>(2.3)  |
| Parathion-methyl     | 207 | 10 | 0.68 | 109.7<br>(9.1) | 99.2<br>(3.7)  | Triasulfuron                  | 239 | 10 | 0.41 | 78.7<br>(8.8)   | 93.6<br>(0.9)  |
| Pirimiphos-methyl    | 208 | 10 | 1.54 | 89.6<br>(3.6)  | 113.8<br>(2.6) | Dimoxystrobin                 | 240 | 10 | 1.57 | 85.5<br>(3.4)   | 112.0<br>(0.9) |
| Cyromazine           | 241 | 10 | 1.23 | 76.2<br>(3.1)  | 85.7<br>(2.2)  | Simazine                      | 250 | 10 | 1.48 | 88.3<br>(11.6)  | 100.2<br>(0.7) |
| Fluopicolide         | 242 | 10 | 1.35 | 90.4<br>(5.8)  | 104.1<br>(2.4) | Pethoxamid                    | 251 | 10 | 2.72 | 99.1<br>(5.1)   | 114.6<br>(3.4) |
| Triforine            | 243 | 10 | 1.38 | 96.8<br>(0.3)  | 103.3<br>(6.1) | Phoxim                        | 252 | 10 | 1.92 | 109.2(3.8)      | 106.6<br>(5.5) |
| Clodinafop-propargyl | 244 | 10 | 1.49 | 92.1<br>(2.2)  | 108.0<br>(1.6) | Metconazole                   | 253 | 10 | 1.83 | 96.4<br>(5.0)   | 102.2<br>(3.8) |
| Prosulfuron          | 245 | 10 | 0.78 | 80.5<br>(2.1)  | 96.0<br>(0.8)  | Flurprimidol                  | 254 | 10 | 1.25 | 110.3<br>(0.6)  | 111.3<br>(0.7) |
| Fenitrothion         | 246 | 10 | 2.30 | 94.5<br>(6.5)  | 107.4<br>(1.6) | Indole-3-<br>butyric acid     | 255 | 10 | 2.07 | 103.7<br>(12.6) | 107.6<br>(4.9) |
| Oxamyl               | 247 | 10 | 1.29 | 106.8<br>(2.1) | 108.0<br>(4.5) | EthylIndole-3-<br>carboxylate | 256 | 10 | 0.70 | 93.0<br>(4.7)   | 94.9<br>(3.4)  |

|              |     |    |      |                |                |                         |     |    |      |                |                |
|--------------|-----|----|------|----------------|----------------|-------------------------|-----|----|------|----------------|----------------|
| Azimsulfuron | 248 | 10 | 0.17 | 82.1<br>(10.5) | 90.0<br>(5.5)  | 3-Indolylacetic<br>acid | 257 | 10 | 0.67 | 96.6<br>(12.3) | 106.6<br>(7.8) |
| Aldicarb     | 249 | 10 | 0.6  | 119.9<br>(7.3) | 114.8<br>(2.2) | Mepiquat<br>chloride    | 258 | 10 | 1.59 | 106.3<br>(1.4) | 113.6<br>(2.1) |
